# Supplementary material for: Spatial characteristics of physical education teacher allocation in basic education: a GIS-based case study of Xi’an, China
Source: Frontiers journal article supplement (doi:10.3389/feduc.2025.1649639), 2025-09-09
Supplement: Table_1.xlsx [file Table_1.xlsx]

## Sheet: 高德解析结果
Name of the school	School Address	lon_gcj02	lat_gcj02
西安市高陵区鹿苑张家小学	陕西省西安市高陵区张卜乡张家村张家组	109.152	34.5379
西安市高陵区高家小学	陕西省西安市高陵区鹿苑街道鹿鸣东路	109.103	34.5356
西安市高陵区创想初级中学	陕西省西安市高陵区通远街道办经一路东南角	109.049	34.5544
西安市高陵区通远中心小学	陕西省西安市高陵区通远街道南北四号路	109.046	34.5326
高陵兴国小学	陕西省西安市高陵区泾渭街道泾渭四路2号	109.01	34.4459
西安市高陵区榆楚中学	陕西省西安市高陵区榆楚村一组	109.07	34.5039
西安市高陵区城关小学	陕西省西安市高陵区东街153号	109.088	34.5376
西安市高陵区榆楚安家中心小学	陕西省西安市高陵区榆楚镇安家路	109.087	34.5045
西安市高陵区张卜中学	陕西省西安市高陵区张卜街道东段	109.136	34.4995
西安市高陵区第四中学	陕西省西安市高陵区南新街300号	109.088	34.5279
西安市高陵区药惠中学	陕西省西安市高陵区鹿苑街道办药惠村	109.12	34.5534
西安市高陵区第二实验小学	陕西省西安市高陵区鹿苑街道办上林二路1665号	109.087	34.5177
西安市高陵区鹿苑草市中心小学	陕西省西安市高陵区鹿苑街道草市村	109.086	34.5308
西安市高陵区渭滨学校	陕西省西安市高陵区泾渭街道办泾渭二路	108.991	34.442
西安市高陵区庙西中学	陕西省西安市高陵区张卜庙西村	109.125	34.5082
西安市高陵区张卜新建小学	陕西省西安市高陵区张卜街道新夹路	109.149	34.4981
西安市高陵区张卜南郭小学	陕西省西安市高陵区张卜街道新咀路	109.161	34.4722
西安市高陵区通远中学	陕西省西安市高陵区通远街道通远村	109.041	34.5517
西安市高陵区崇皇绳刘小学	陕西省西安市高陵区崇皇街道绳刘村	109.038	34.5047
高陵嘉园小学	陕西省西安市高陵区崇皇街道崇皇社区	109.022	34.501
西安市高陵区耿镇耿北小学	陕西省西安市高陵区耿镇街道耿北村	109.105	34.4503
西安市高陵区第一中学	陕西省西安市高陵区昭惠路	109.103	34.5233
高陵国定小学	陕西省西安市高陵区泾河工业园桑军大道中段渭阳四路	109.036	34.4722
西安市高陵区第三中学	陕西省西安市高陵区泾环北路1135号	109.021	34.5035
西安市高陵区姬家雷家小学	陕西省西安市高陵区姬家街道泾高南路南	109	34.4846
西安市高陵区耿镇中学	陕西省西安市高陵区耿镇街道耿镇村	109.106	34.435
西安市高陵区崇皇中学	陕西省西安市高陵区崇皇街道桑家村泾环北路999号	109.023	34.504
西安市高陵区鹿苑北街小学	陕西省西安市高陵区鹿苑街道西环城路	109.085	34.5362
西安市高陵区湾子关市小学	陕西省西安市高陵区湾子镇	109.013	34.5795
西安市高陵区湾子中心小学	陕西省西安市高陵区通远街道湾子村	109	34.5665
西安市高陵区通远灰堆坡小学	陕西省西安市高陵区通远镇东街	109.089	34.5381
西安市高陵区鹿苑草王小学	陕西省西安市高陵区鹿苑街道办草市村	109.083	34.5302
西安市高陵区姬家杨官寨小学	陕西省西安市高陵区姬家街道杨官寨村陕汽路1162号	109.011	34.4671
西安市高陵区耿镇苏家小学	陕西省西安市高陵区耿镇街道苏家村二组苏虎路	109.092	34.4364
西安市经开第八中学	陕西省西安市高陵区泾勤路中段	109.032	34.4993
西安市高陵区姬家肖家小学	陕西省西安市高陵区姬家乡肖家村七组	108.982	34.5322
西安市高陵区耿镇虎家小学	陕西省西安市高陵区耿镇街道虎家村	109.133	34.4297
西安市高陵区鹿苑江流小学	陕西省西安市高陵区鹿苑街道江流村	109.152	34.5293
西安市高陵区泾渭梁村塬小学	陕西省西安市高陵区泾渭街道梁村塬村	108.967	34.4324
西安市高陵区崇皇井王小学	陕西省西安市高陵区崇皇街道井王村	109.042	34.4704
西安市高陵区湾子西张市小学	陕西省西安市高陵区湾子乡西张市	109.001	34.5438
西安市高陵区湾子中学	陕西省西安市高陵区通远街道湾子村	109	34.5665
西安市高陵区鹿苑北樊小学	陕西省西安市高陵区鹿苑街道北樊村	109.091	34.5671
西安市高陵区崇皇桑家中心小学	陕西省西安市高陵区崇皇街道桑家村	109.031	34.4973
西安市高陵区昭慧中学	陕西省西安市高陵区昭惠东路888号	109.088	34.535
西安经开第十六小学	陕西省西安市高陵区泾勤路中段	109.032	34.4993
西安市高陵区泾渭西营中心小学	陕西省西安市高陵区泾渭街道西营村	109.006	34.4445
西安市高陵区鹿苑田家小学	陕西省西安市高陵区鹿苑街道昭慧东路1515号	109.103	34.5225
西安市高陵区耿镇王家滩小学	陕西省西安市高陵区耿镇街道王家滩村13组	109.095	34.4473
西安市高陵区湾子岳华小学	陕西省西安市高陵区通远街道湾子村	109	34.5665
西安市高陵区船张观澜小学	陕西省西安市高陵区崇皇街道泾渭观澜社区旅游大道0号	109.048	34.4748
西安市高陵区姬家姜李小学	陕西省西安市高陵区姬家街道姜李村	108.984	34.4847
西安市高陵区泾渭店子王小学	陕西省西安市高陵区泾渭街道店子王村	108.985	34.4506
西安市高陵区泾渭陈家滩小学	陕西省西安市高陵区泾渭街道陈家滩村三组	108.985	34.4839
西安市高陵区崇皇军庄小学	陕西省西安市高陵区崇皇街道军庄村	109.036	34.4867
西安市高陵区张卜中心小学	陕西省西安市高陵区张卜街道张卜村	109.123	34.4821
西安市高陵区鹿苑古城小学	陕西省西安市高陵区鹿苑街道办事处古城村	109.072	34.527
西安市高陵区鹿苑中学	陕西省西安市高陵区鹿苑街道东街197号	109.092	34.536
西安市高陵区崇皇高墙小学	陕西省西安市高陵区崇皇街道高墙村	109.055	34.4929
西安市高陵区鹿苑东升小学	陕西省西安市高陵区鹿苑街道224县道	109.125	34.5321
西安市高陵区药惠银王中心小学	陕西省西安市高陵区药惠乡银王村	109.126	34.5382
西安市高陵区崇皇徐吾小学	陕西省西安市高陵区崇皇街道陕汽路	109.024	34.4682
西安市高陵区职业技术教育中心	陕西省西安市高陵区通远镇东街	109.089	34.5381
西安市高陵区第一实验小学	陕西省西安市高陵区鹿岭路246号	109.088	34.535
西安市高陵区通远火箭小学	陕西省西安市高陵区通远街道火箭村	109.068	34.572
西安市高陵区榆楚钓北小学	陕西省西安市高陵区榆楚乡钓北	109.076	34.4758
西安市高陵区通远仁村小学	陕西省西安市高陵区通远街道仁马路	109.067	34.5758
西安市高陵区药惠小学	陕西省西安市高陵区鹿苑街道白马路西	109.121	34.5537
西安市高陵区泾渭中学	陕西省西安市高陵区泾渭街道泾渭街道办泾渭中路90号	108.987	34.445
西安高新泾河小学	陕西省西安市高陵区泾渭五路6号	109.014	34.4454
西安市高陵区张卜庙西小学	陕西省西安市高陵区张卜街道庙西村	109.125	34.5082
西安市高陵区耿镇中心小学	陕西省西安市高陵区耿镇街道耿镇村	109.106	34.435
陕西航空医科职业技术学校	陕西省西安市阎良区蓝天二路与航空四路交汇处200米路东	109.199	34.6305
西安市阎良区关山中学	陕西省西安市阎良区四维北路	109.385	34.6889
西安市阎良区第二小学	陕西省西安市阎良区科研巷54号	109.238	34.6567
西安市阎良区武屯职业高级中学	陕西省西安市阎良区武屯街道74号	109.304	34.6368
西安市阎良区武屯初级中学	陕西省西安市阎良区振关路与康交路交叉口西360米	109.276	34.6497
西安市阎良区迎宾小学	陕西省西安市阎良区迎宾路	109.214	34.6608
西安市阎良区职业中学	陕西省西安市阎良区武屯街道74号	109.304	34.6368
西安市阎良区西飞第一小学	陕西省西安市阎良区延安路	109.226	34.6628
西安市阎良区北屯学校	陕西省西安市阎良区北屯街道办	109.236	34.6169
西安市阎良区凤凰路街道办事处中心小学	陕西省西安市阎良区航空城大道西段	109.201	34.6674
西安市阎良区关山四维小学	陕西省西安市阎良区官关路121号	109.379	34.6964
西安市阎良区北屯街道办事处中心小学	陕西省西安市阎良区北屯街道办	109.236	34.6169
西安市阎良区武屯红丰小学	陕西省西安市阎良区武屯镇红丰村	109.299	34.6364
西安市阎良区新华小学	陕西省西安市阎良区人民东路173号	109.236	34.6597
西安市阎良区六三0中学	陕西省西安市阎良区人民东路55号	109.244	34.6592
西安市阎良区关山永丰小学	陕西省西安市阎良区万年南路与永丰路交叉口南80米	109.39	34.6873
西安市阎良区西飞第一中学	陕西省西安市阎良区新华路街道办倚天路	109.259	34.6662
西安市阎良区武屯中心小学	陕西省西安市阎良区武屯街道办事处旁边高中对面	109.305	34.6373
西安市阎良区振兴街道办事处中心小学	陕西省西安市阎良区航空城大道西段	109.201	34.6674
西安市阎良区关山康桥小学	陕西省西安市阎良区关山镇康桥老街西段	109.404	34.7127
西安市阎良区关山中心小学	陕西省西安市阎良区阎油路	109.262	34.6645
西安市阎良区西飞第二中学	陕西省西安市阎良区教育巷24号	109.23	34.6611
西安市阎良区聚宝小学	陕西省西安市阎良区青松路	109.19	34.652
西安市阎良区第一中学	陕西省西安市阎良区新华路街道办倚天路	109.259	34.6662
西安市阎良区西飞第二小学	陕西省西安市阎良区科研巷54号	109.238	34.6567
西安市阎良区西飞第四小学	陕西省西安市阎良区凤凰路街道安全巷2号	109.226	34.6561
西安市阎良区荆山小学	陕西省西安市阎良区航博大道与公园新街交叉口东420米	109.218	34.674
西安市阎良区新兴街道办事处中心小学	陕西省西安市阎良区新兴街道屈家大队	109.277	34.664
西安市阎良区第二实验小学	陕西省西安市阎良区人民东路14号	109.244	34.6599
西安市阎良区关山南樊小学	陕西省西安市阎良区关山南樊小学	109.382	34.6585
西安市航空基地第一学校	陕西省西安市阎良区振兴街道蓝天二路	109.204	34.6313
西安市阎良区关山初级中学	陕西省西安市阎良区关山中学东	109.386	34.6927
西安市阎良区武屯御宝小学	陕西省西安市阎良区武屯街道御宝村	109.338	34.6402
西安市阎良区武屯三义小学	陕西省西安市阎良区武屯镇杨新庄村	109.299	34.6364
西安市阎良区关山康桥初级中学	陕西省西安市阎良区关山街道康桥村	109.318	34.6845
西安航空基地第一小学	陕西省西安市阎良区振兴街道蓝天二路	109.204	34.6313
西安市阎良区关山粟邑小学	陕西省西安市阎良区关山镇粟邑村庙河东组	109.355	34.6512
西安市阎良区实验小学	陕西省西安市阎良区人民东路173号	109.236	34.6597
西安市阎良区关山南房小学	陕西省西安市阎良区关山镇	109.404	34.7127
陕西省西安师范附属小学	陕西省西安市碑林区南大街书院门123号	108.948	34.253
西安西北中学	陕西省西安市碑林区保吉巷小区26号	108.938	34.2528
西安体育艺术小学校	陕西省西安市雁塔区朱雀大街169号	108.939	34.211
曲江金辉小学	陕西省西安市雁塔区雁翔路99号	109.002	34.2253
西安翱翔中学	陕西省西安市碑林区友谊西路127号	108.915	34.2433
西安市碑林区大学南路小学	陕西省西安市碑林区大学南路68号	108.929	34.2458
西安市第七十一中学	陕西省西安市碑林区友谊东路369号	108.958	34.2415
西安市碑林区小雁塔小学	陕西省西安市碑林区长安路街道友谊西路108号	108.939	34.2393
西安市碑林区雁塔路小学	陕西省西安市碑林区长胜街8号	108.96	34.2446
西安市碑林区永宁小学	陕西省西安市碑林区柿园路25号	108.985	34.2596
西安铁一中国际合作学校	陕西省西安市雁塔区黄渠头三路369号	109.016	34.212
西安市铁一中学	陕西省西安市碑林区太乙路街道友谊东路120号	108.974	34.24
西安市碑林区实验小学	陕西省西安市碑林区安东街100号	108.969	34.2489
西安辅轮中学	陕西省西安市雁塔区大雁塔街道青龙北路8号	108.901	34.2169
西安市碑林区兴庆小学	陕西省西安市碑林区兴庆小区小区东西道1号	108.994	34.2624
西安市第六中学分校	陕西省西安市碑林区长安路街道雁塔寺街5号	108.943	34.2456
西安市第六中学	陕西省西安市碑林区五味什字31号	108.937	34.2559
西安城市科技职业学校	陕西省西安市雁塔区富鱼路168号	108.821	34.2354
西安市含光中学	陕西省西安市碑林区含光北路152号	108.932	34.2478
西安综合职业中等专业学校	陕西省西安市碑林区东厅门85号	108.956	34.2573
西安市奥体学校	陕西省西安市碑林区伞塔路89号	108.992	34.2655
西安建筑科技大学附属小学	陕西省西安市碑林区建设路139号	108.941	34.2567
西北工业大学附属小学	陕西省西安市碑林区友谊西路127号	108.915	34.2433
西北大学附属小学	陕西省西安市碑林区太白北路324号	108.921	34.2478
西安工业大学附属小学	陕西省西安市碑林区东二环伞塔路46号	108.993	34.2638
西安市碑林区朱雀大街小学	陕西省西安市碑林区振兴路64号	108.942	34.2473
西安市碑林区五味什字小学	陕西省西安市碑林区盐店街42号	108.937	34.2575
西安市星光实验学校	陕西省西安市碑林区金花南路38号	109.003	34.2485
西安市碑林区南门小学	陕西省西安市碑林区南关正街51号	108.947	34.2438
西安市碑林区仁厚庄小学	陕西省西安市碑林区东关南街街道办事处仁厚庄社区居委会	108.992	34.2545
西安市碑林区大学南路小学分校	陕西省西安市碑林区水文巷46号	108.928	34.2393
西安市碑林区东厅门小学	陕西省西安市碑林区东厅门1号	108.958	34.2561
西安市碑林区景龙池小学	陕西省西安市碑林区长乐坊街道景龙池74号	108.985	34.2623
西安市第十二中学	陕西省西安市碑林区标新街13号	108.967	34.248
西安市第三中学分校	陕西省西安市碑林区伞塔路168号	108.99	34.2633
西安市碑林区友谊小学	陕西省西安市碑林区测绘东路208号	108.959	34.2393
西安交通大学附属中学	陕西省西安市曲江新区雁翔路99号	109.002	34.2253
西北大学附属中学	陕西省西安市雁塔区高新四路15号	108.895	34.2394
西安市碑林区何家村小学	陕西省西安市碑林区含光路中段21号	108.928	34.2357
西安理工大学附属中学	陕西省西安市碑林区爱学路125号	108.941	34.2567
西安工业大学附中	陕西省西安市碑林区伞塔路46号	108.993	34.2638
西安理工大附属小学	陕西省西安市碑林区东关南街街道办事处西安理工大学社区居委会	108.999	34.2537
西安市碑林区永新小学	陕西省西安市碑林区五道什字东街82号	108.977	34.2643
西安市碑林区沙坡小学	陕西省西安市碑林区太乙路街道办事处兴庆南路社区居委会	108.991	34.2481
西安市碑林区建国路小学	陕西省西安市碑林区建国路98号	108.966	34.2561
西安民兴中学	陕西省西安市碑林区东仓巷21号	108.96	34.2545
西安市碑林区乐居厂小学	陕西省西安市碑林区太乙路街道办事处乐居场第一社区居委会	108.977	34.2483
西安市碑林区文艺路小学	陕西省西安市碑林区文艺北路26号	108.954	34.2432
西安市碑林区钟楼小学	陕西省西安市碑林区南大街书院门123号	108.948	34.253
西安市碑林区振兴路小学	陕西省西安市碑林区振兴路39号	108.943	34.2469
西安市中铁中学	陕西省西安市碑林区太乙路68号	108.972	34.2393
西安兴庆中学	陕西省西安市碑林区兴庆南路135号	108.941	34.2567
西安市碑林区铁五小学	陕西省西安市碑林区友谊东路铁安三街	108.978	34.2406
西安市碑林区东羊市小学	陕西省西安市碑林区东羊市26号	108.962	34.2568
西安交通大学附属小学	陕西省西安市碑林区咸宁西路28号	108.984	34.2466
西安市碑林区东关小学	陕西省西安市碑林区柿园路248号	108.979	34.2585
西安市第二中学	陕西省西安市碑林区东关南街龙渠堡6号	108.979	34.2581
西安市第八十六中学	陕西省西安市碑林区明胜路65号	108.959	34.2443
西安建筑科技大学附属中学	陕西省西安市碑林区建设路139号	108.941	34.2567
西安市碑林区东关南街小学	陕西省西安市碑林区东关南街236号	108.975	34.2575
西安市第八十二中学	陕西省西安市碑林区友谊西路286号	108.928	34.2408
西安市第八中学	陕西省西安市碑林区东县门8号	108.961	34.2556
西安市碑林区铁五第二小学	陕西省西安市碑林区铁安一街7号	108.975	34.2361
西安市第二十六中学分校	陕西省西安市碑林区环城南路东段72号	108.958	34.2508
西安市太乙路中学	陕西省西安市碑林区太乙路148号	108.972	34.2453
西安市第二十六中学	陕西省西安市碑林区建国路118号	108.967	34.2576
西北工业大学附属中学	陕西省西安市碑林区友谊西路127号	108.915	34.2433
西安尊德中学	陕西省西安市碑林区长乐坊110号	108.982	34.2632
西安市第三中学	陕西省西安市碑林区长乐坊77号	108.984	34.2638
西安市长安区韦曲街道东兆余小学	陕西省西安市长安区韦曲街道东兆余村	108.997	34.1601
西安艺术职业高级中学	陕西省西安市长安区子午大道南段	108.897	34.076
西安市长安区第二中学	陕西省西安市长安区韦曲街办樊川路3号	108.992	34.1214
西安市长安区第十二小学	陕西省西安市长安区文苑南路3号	108.875	34.1369
西安高新区第五初级中学	陕西省西安市长安区经十二路与三十二路十字西南角	108.849	34.148
西安市长安区斗门街道办事处初级中学	陕西省西安市长安区斗门街道	108.771	34.2235
西安市长安区西北大学附属初级中学	陕西省西安市长安区郭杜教育科技产业开发区学府大道1号	108.924	34.149
西安市长安区引镇街道龙渠小学	陕西省西安市长安区引镇街道龙渠村	109.116	34.0458
西安市长安区斗门街道办事处八一小学	陕西省西安市长安区斗门街道八一村附近	108.808	34.2186
西安市长安区第一小学实验小学	陕西省西安市长安区郭杜街道汇文街	108.875	34.1526
西安文达职业高级中学	陕西省西安市未央区红光路6号	108.844	34.2589
西安高新新徽学校	陕西省西安市长安区丈八六路与锦业四路交叉口北360米	108.856	34.1957
西安航天城第六小学	陕西省西安市长安区航天基地神舟六路6号	108.986	34.1705
西安市长安区第八中学	陕西省西安市长安区王曲街道甲字2号	108.941	34.1059
西咸新区沣东新城第一初级中学	陕西省西咸新区沣东新城王寺街道科源东路和科统三路十字东南角	108.789	34.2583
西安市长安区一民初级中学	陕西省西安市长安区韦曲街道双竹村	108.955	34.1433
西咸新区沣西东马坊小学	陕西省西咸新区沣西新城东马坊村	109.117	34.4291
西安市长安区第三初级中学	陕西省西安市长安区申店甲字10号	108.943	34.1378
西安市长安区第五中学	陕西省西安市长安区引镇街道鸿翔西街	109.103	34.0755
西安市航天城第十学校	陕西省西安市长安区航天中路东段以北原东兆余村	108.997	34.1601
西安市长安区马王街道初级中学	陕西省西安市长安区马王街道	108.9	34.0899
西安市长安区兴国初级中学	陕西省西安市长安区南长安街259号	108.946	34.1473
西安航天城第七小学	陕西省西安市长安区少陵路西段	108.962	34.1423
西安市长安区王莽街道九年制学校	陕西省西安市长安区王莽街道	109.057	34.0553
西北大学附属大学城学校	陕西省西安市长安区郭杜街道学府大道	108.924	34.149
西安高新一中实验中学	陕西省西安市长安区竹南路816号	108.827	34.1012
西安市长安区五台街道中心学校	陕西省西安市长安区五台街道	108.971	34.0319
沣东新城红星小学	陕西省西安市长安区斗门街办中丰店村	108.754	34.1838
西安市长安区子午街道中心学校	陕西省西安市长安区子午街道	108.9	34.0899
西安市长安区子午街道初级中学	陕西省西安市长安区子午街道	108.9	34.0899
西安万科城初级中学	陕西省西安市长安区樱花一路中段	108.887	34.1618
西安市长安区引镇街道初级中学	陕西省西安市长安区引镇街道	109.101	34.0878
西安市长安区太乙宫街道初级中学	陕西省西安市长安区太乙宫街道	109.009	34.0232
西安市长安区大兆街道倪家滩小学	陕西省西安市长安区大兆街道倪家滩村	109.064	34.159
西安长安红杉树小学	陕西省西安市长安区新民村	108.922	34.1003
西咸新区第二初级中学	陕西省西安市长安区文瀚路与英华二路交叉口西北120米	108.732	34.2299
西安市长安区王曲街道中心学校	陕西省西安市长安区王曲街道	108.941	34.1059
西安万象艺术职业高中	陕西省西安市长安区子午镇曹村甲字2号	108.931	34.0535
西安市长安区鸣犊街道师村小学	陕西省西安市长安区鸣犊街道师村	109.11	34.1251
西安高新区第三十一小学	陕西省西安市长安区小仁村西太路西边	108.845	34.1509
西安现代职业高中	陕西省西安市长安区子午大道466号	108.901	34.0875
西安市长安区魏寨街道中心学校	陕西省西安市长安区魏寨街道	108.9	34.0899
西安市长安区引镇街道中心学校	陕西省西安市长安区引镇街道	109.101	34.0878
西安市长安区高桥乡初级中学	陕西省西安市长安区高桥街道	108.9	34.0899
西安市长安区太乙宫街道中心学校	陕西省西安市长安区太乙宫街道	109.009	34.0232
西安市长安区第三小学	陕西省西安市长安区韦曲街道府东一路	108.911	34.1635
西安长安博雅小学	陕西省西安市长安区樱花一路雅居乐铂琅峯小区西侧	108.892	34.1624
西安长安湖居笔记小学	陕西省西安市长安区相关楼盘湖居笔记	108.907	34.1587
西安高新区第六初级中学	陕西省西安市长安区毕原二路	108.834	34.1666
西安市长安区王莽街道汤房庙小学	陕西省西安市长安区王莽街道汤房庙村	109.057	34.0553
西安高新区第二十六小学	陕西省西安市长安区陕西省西安市高新区灵秀西路	108.907	34.1587
西安市长安区杜曲街道岳村小学	陕西省西安市长安区杜曲街道岳村	108.969	34.1138
西安市长安区兴隆街道初级中学	陕西省西安市长安区兴隆街道	108.833	34.1035
长安兴国小学	陕西省西安市长安区韦曲南街150号	108.938	34.1457
西安市航天城第三初级中学	陕西省西安市长安区航天基地神舟四路与麟凤路十字东南侧(麟凤路中段)	108.974	34.1642
西安市长安区王莽街道韦兆小学	陕西省西安市长安区王莽街道韦兆村	109.068	34.0744
西安航天城第四小学	陕西省西安市长安区航天基地飞天路	108.976	34.1615
西安市长安区子午街道张村小学	陕西省西安市长安区子午街道张村	108.892	34.069
西安市长安区职教中心	陕西省西安市长安区郭杜街道樱花广场南侧	108.876	34.1599
西安市长安区第七小学	陕西省西安市长安区翰林北路7号	108.869	34.1566
西安市长安区魏寨街道彭村小学	陕西省西安市长安区魏寨街道彭村	109.145	34.1141
西安航天城第二小学	陕西省西安市长安区航天基地航拓路1678号	108.989	34.165
西安航天城第一小学	陕西省西安市长安区航天基地神舟二路39号	108.958	34.166
西安市长安区杨庄街道中心学校	陕西省西安市长安区杨庄街道	109.145	34.0412
西安市长安区陕西师范大学附属中学	陕西省西安市长安区西长安街与学府大街交汇处	108.904	34.1467
西安市长安区第三中学	陕西省西安市长安区韦曲街道青年街61号	108.944	34.1532
西安市长安区杨庄街道库峪口小学	陕西省西安市长安区杨庄街道库峪口村	109.171	34.0096
西安沣东第一学校	陕西省西安市长安区王寺街道科源东路68号	108.797	34.263
西安市长安区第五小学	陕西省西安市长安区郭杜街道神禾三路1666号	108.911	34.1294
西安市长安区引镇街道南寨小学	陕西省西安市长安区引镇街道南寨村	109.101	34.0878
西安八一民族中学	陕西省西安市长安区韦曲街道小烟庄甲字一号	108.861	34.2239
西安市长安区鸣犊街道中心学校	陕西省西安市长安区鸣犊街道	109.11	34.1251
西安市长安区第二初级中学	陕西省西安市长安区韦曲街道城南大道东侧	108.922	34.1433
西安市长安区高桥街道五席坊小学	陕西省西安市长安区高桥街道五席坊村	108.736	34.2739
西安市长安区第十中学	陕西省西安市长安区黄良街道	108.899	34.0902
西安市长安区引镇街道屈家斜小学	陕西省西安市长安区引镇街道屈家斜村	109.116	34.0663
西安市长安区郭杜街道周家庄小学	陕西省西安市长安区郭杜街道周家庄村	108.883	34.1275
西安市航天城第二中学	陕西省西安市长安区航腾路与望月路丁字口朱坡村安置中建二局项目部	108.965	34.152
西安市长安区黄良街道中心学校	陕西省西安市长安区黄良街道	108.899	34.0902
西安长安万科城小学	陕西省西安市长安区樱花一路中段	108.887	34.1618
西京小学	陕西省西安市长安区西京路1号	108.934	34.1435
西安高新区第八初级中学	陕西省西安市长安区西安市高新区云上路355号	108.821	34.1076
西安市长安区鸣犊街道留公小学	陕西省西安市长安区鸣犊街道留公村	109.079	34.1413
西安市长安区实验小学	陕西省西安市长安区韦曲街道育新巷5号	108.935	34.1589
长安区第一民办中学	陕西省西安市长安区樊川路21号	108.961	34.1397
西安长安绿地城小学	陕西省西安市长安区长安宫	108.907	34.1587
西安市长安区杜曲街道韦村小学	陕西省西安市长安区杜曲街道韦村	108.943	34.166
西安航天基地富力城黄河小学	陕西省西安市长安区航天基地神舟四路468号	108.974	34.1572
西安市长安区第八小学	陕西省西安市长安区神禾一路与常顺街交叉口西北180米	108.909	34.121
西安市长安区砲里街道东岭小学	陕西省西安市长安区砲里街道东岭村	109.151	34.1434
西安市长安区滦镇街道景民初级中学	陕西省西安市长安区滦镇街道	108.827	34.0653
西安市高新第二高级中学	陕西省西安市高新区创汇路30号	108.854	34.1626
西安长安橡树湾小学	陕西省西安市长安区韦曲街道滨河大道东段	108.957	34.1354
西安市长安区韦曲街道新和小学	陕西省西安市长安区韦曲街道新和村	109.008	34.1317
西安长安兴华小学	陕西省西安市长安区韦曲街道滨河大道东段	108.957	34.1354
西安市长安区黄良街道仁村小学	陕西省西安市长安区黄良街道仁村	109.107	34.1069
西安市长安区杜曲街道樊村初级中学	陕西省西安市长安区杜曲街道樊村	108.987	34.103
西安高新区第二十四小学	陕西省西安市长安区三星快速干道紫薇生态城东	108.764	34.1396
西安市长安区王莽街道清水头小学	陕西省西安市长安区王莽街道清水头村	109.059	34.0341
西安市长安区韦曲街道中心学校	陕西省西安市长安区韦曲街道	108.935	34.1589
西安沣东中加学校	陕西省西安市长安区沣东新城汉池路8号	108.793	34.2325
西安航天城第三小学	陕西省西安市长安区神舟二路369号	108.962	34.1575
西安市长安区第一中学实验初级中学	陕西省西安市长安区郭杜街道建业三路南侧	108.866	34.1525
西安市长安区陕西师范大学附属小学	陕西省西安市长安区西长安街与府东一路交汇处	108.91	34.1572
西安市长安区第一小学	陕西省西安市长安区韦曲街道惠民街	108.928	34.1528
长安美林小学	陕西省西安市长安区广场北路圣合二期小区	108.928	34.1628
西安市长安区兴隆街道宫字小学	陕西省西安市长安区兴隆街道宫字村	108.833	34.1035
西安市长安区大兆街道中心学校	陕西省西安市长安区大兆街道	109.035	34.1163
西安长安悦美小学	陕西省西安市长安区书香路与樱花二路十字东北角	108.898	34.1652
西安市长安区滦镇街道鸭池口初级中学	陕西省西安市长安区滦镇街道鸭池口村	108.873	34.0531
西安市长安区滦镇街道中心学校	陕西省西安市长安区滦镇街道	108.827	34.0653
西安市长安区引镇街道北留小学	陕西省西安市长安区引镇街道北留村甲字5号	109.08	34.1051
西安市长安区杜曲街道杨万小学	陕西省西安市长安区杜曲街道杨万村	109.006	34.1057
西安市长安区韦曲街道何家营小学	陕西省西安市长安区韦曲街道何家营村甲字1号	108.94	34.1324
西安市长安区大兆街道庞留小学	陕西省西安市长安区大兆街道庞留村	109.041	34.1111
西安市长安区子午街道东村小学	陕西省西安市长安区子午街道东村	108.9	34.0899
西安市高新第二初级中学	陕西省西安市长安区定昆池二路151号	108.828	34.1784
西安市长安区郭杜街道香积寺逸夫中学	陕西省西安市长安区郭杜街道香积寺村中学路15路	108.895	34.1234
西安市长安区第一初级中学	陕西省西安市长安区王曲街道新民村	108.926	34.1008
西咸新区沣东新城第一小学	陕西省西安市长安区沣东新城科源一路	108.776	34.2591
西安市长安区杜曲街道师家村小学	陕西省西安市长安区杜曲街道师家村	108.988	34.1
西安市长安区鸣犊街道四坡小学	陕西省西安市长安区鸣犊街道任家坡村甲字1号	109.136	34.135
西安市长安区第十一中学	陕西省西安市长安区大兆街道大兆村权家街53号	109.054	34.1344
西安长安子峪小学	陕西省西安市长安区子午街道曹村甲字２号	108.931	34.0535
西安市长安区黄良街道湖村小学	陕西省西安市长安区黄良街办西湖村	108.915	34.0826
西安市长安区郭杜街道杜回小学	陕西省西安市长安区郭杜街道翰林南路	108.869	34.1394
西咸新区沣东新城德立小学	陕西省西安市长安区斗门镇花园村	108.766	34.2274
西安市长安区滦镇街道西留小学	陕西省西安市长安区滦镇街道西留村	108.827	34.0653
西安市长安区滦镇街道乔村小学	陕西省西安市长安区滦镇街道乔村	108.847	34.0579
西安市长安区郭杜街道第五桥小学	陕西省西安市长安区郭杜街道第五桥村	108.869	34.1603
西安航天城第五小学	陕西省西安市长安区航天西路阳光美地西南侧约150米	108.955	34.1534
西安市长安区大兆街道章曲小学	陕西省西安市长安区大兆街道章曲村中5号	109.035	34.1163
西安市长安区引镇街道大峪口小学	陕西省西安市长安区大峪口村引大路	109.118	34.0344
西安市长安区韦曲街道双竹小学	陕西省西安市长安区韦曲街道双竹村341号	108.958	34.1412
西安市长安区东大街道祥峪小学	陕西省西安市长安区东大街道祥峪口村120号	108.769	34.004
西安市长安区滦镇街道泉子头小学	陕西省西安市长安区滦镇街道泉子头村	108.848	34.0876
西安市长安区韦曲街道侯家湾小学	陕西省西安市长安区韦曲街道侯家湾村	108.933	34.1512
西安市长安区滦镇街道内苑小学	陕西省西安市长安区滦镇街道内苑村	108.862	34.0563
西安长安湖滨小学	陕西省西安市长安区子午大道和学府大道十字西南处	108.897	34.1491
西安市长安区斗门街道办事处落水小学	陕西省西安市长安区斗门街道落水村	108.777	34.2412
西安高新第九小学	陕西省西安市长安区定昆池三路5号	108.826	34.1757
西安高新区第七初级中学	陕西省西安市长安区高新国际社区灵秀一路	108.764	34.1318
西安市长安区东大街道太平河小学	陕西省西安市长安区东大街道太平河村	108.77	34.0646
西安市长安区郭杜街道中心学校	陕西省西安市长安区郭杜街道郭北村	108.756	34.0606
西安市长安区引镇街道孙车小学	陕西省西安市长安区引镇街道车家岩村	109.146	34.0688
西安市长安区杜曲街道中心学校	陕西省西安市长安区杜曲街道新街70号	109.006	34.1056
长安启迪小学	陕西省西安市长安区青年南街202号	108.942	34.1475
西咸新区沣东第十小学	陕西省西安市长安区海逸长洲营销中心东400米(镐京大道北)	108.746	34.231
西安市长安区王莽街道中心学校	陕西省西安市长安区王莽街道稻地江村	109.042	34.0649
西安市长安区第一中学	陕西省西安市长安区韦曲街办西四府村甲字2号	108.966	34.1368
西安市长安区杜曲街道小江村小学	陕西省西安市长安区杜曲街道小江村	108.96	34.1201
西安高新区第十一小学	陕西省西安市长安区创汇社区D区南门西100米	108.828	34.1773
西安市长安区滦镇街道滦村小学	陕西省西安市长安区滦镇街道下滦村	108.807	34.0607
西安市长安区南街小学	陕西省西安市长安区青年南街71号	108.944	34.151
西安高新区第二十二小学	陕西省西安市长安区毕原二路	108.834	34.1666
西安市长安区郭杜街道邓店小学	陕西省西安市长安区郭杜街道邓店村	108.853	34.1558
西安市长安区东大街道郭村小学	陕西省西安市长安区东大街道郭北村	108.756	34.0606
西安市长安区大兆街道三友小学	陕西省西安市长安区大兆街道三联村	109.073	34.1534
西安市长安区第十一小学	陕西省西安市长安区韦曲街道申店村	108.943	34.1394
西安高新区第二十七小学	陕西省西安市长安区陕西省西安市高新区林薇路410号	108.819	34.1075
西安南开高级中学	陕西省西安市长安区子午大道588号	108.894	34.1035
西安市长安区滦镇街道王寨小学	陕西省西安市长安区滦镇西王村	108.861	34.0779
西安市长安区第二小学	陕西省西安市长安区子午大道与樱花二路十字西南角	108.904	34.1651
西安旅游职业中等专业学校	陕西省西安市长安区韦曲西四府甲字3号	108.962	34.1379
西安高新第八小学	陕西省西安市高新区锦业路与丈八八路十字西南角	108.89	34.233
西咸新区第二小学	陕西省西安市长安区中央大街1号	108.729	34.2412
西安市长安区杜曲街道西江坡小学	陕西省西安市长安区杜曲镇西江坡村	109.023	34.0933
西安高新区第二十一小学	陕西省西安市长安区纬二十八路	108.852	34.1438
西安市长安区郭杜街道长里小学	陕西省西安市长安区高新区郭杜镇长里村	108.855	34.1749
西安高新区第二十九小学	陕西省西安市鄠邑区灵沼街道南正庄村	108.72	34.1305
西安市长安区五星街道五楼初级中学	陕西省西安市长安区五星街道北张堡村甲字1号	108.907	34.1587
西安高新区第十一初级中学	陕西省西安市长安区高新区西太路西550米秦沣花园西南	108.86	34.1734
西安市长安区五星街道和迪小学	陕西省西安市长安区五星街道和迪村	108.772	34.0981
西安市长安区郭杜街道香积寺小学	陕西省西安市长安区郭杜街道香积寺村	108.895	34.1234
西安市长安区子午街道曹村小学	陕西省西安市长安区子午街道曹村	108.931	34.0535
西安培华职业高中	陕西省西安市长安区常宁大街888号	108.935	34.1252
西安市长安区子午街道王庄初级中学	陕西省西安市长安区子午街道曹村	108.931	34.0535
西安市长安区杜曲街道初级中学	陕西省西安市长安区杜曲街道新街95号	109.006	34.1056
西安市长安区灵沼街道冯村小学	陕西省西安市长安区灵沼街道冯村	108.706	34.1833
西安市长安区第四小学	陕西省西安市长安区靖宁路	108.92	34.1641
西安市长安区大兆街道三益小学	陕西省西安市长安区大兆街道鲍陂村	109.035	34.1163
西安市长安区太乙宫街道新关小学	陕西省西安市长安区太乙宫街道新北村	109.009	34.0232
西安高新区第二十三小学	陕西省西安市长安区陕西省西安市高新区经十二路	108.849	34.148
西安市长安区王曲街道皇甫小学	陕西省西安市长安区王曲街道皇甫村	108.954	34.098
西安市长安区滦镇街道鸭池口小学	陕西省西安市长安区滦镇鸭池口村	108.871	34.0402
西安市长安区杨庄街道初级中学	陕西省西安市长安区杨庄街道杨庄村西街46号	109.147	34.0394
西安市长安区兴隆街道兴隆社区小学	陕西省西安市长安区兴隆街道兴隆社区双江一路	108.809	34.1274
西安市长安区高桥街道屯铺小学	陕西省西安市长安区高桥街道屯铺村	108.707	34.2513
西安市长安区砲里街道初级中学	陕西省西安市长安区砲里街道砲里村	109.142	34.1664
西安市长安区斗门街道办事处张旺渠小学	陕西省西安市长安区斗门街道张旺渠村	108.752	34.234
西安培英育才职业高中有限公司	陕西省西安市长安区航天大道杜陵东路61号	108.953	34.1734
西安市长安区王寺街道中心学校	陕西省西安市长安区王寺街道大苏村120号	108.799	34.2736
西安市长安区大兆街道中兆小学	陕西省西安市长安区大兆街道中兆村1号	109.029	34.1428
西安市长安区细柳街道晨光小学	陕西省西安市长安区细柳街道大吉村	108.766	34.1474
西安市长安区王曲街道曙光小学	陕西省西安市长安区王曲街道曙光村	108.959	34.0635
西安市长安区郭杜街道张康小学	陕西省西安市长安区郭杜镇张康村	108.873	34.1396
西安市长安区滦镇街道新区小学	陕西省西安市长安区韦曲街道办局连村	108.972	34.1314
西安市长安区鸣犊街道马兴小学	陕西省西安市长安区鸣犊街道马连滩村	109.099	34.1554
西安市长安区第一小学城南分校	陕西省西安市长安区韦曲街道办局连村	108.972	34.1314
西安市长安区第九中学	陕西省西安市长安区鸣犊街道二圣宫村甲字1号	109.124	34.1416
长安黄河花园小学	陕西省西安市长安区西京路吉源水岸都市花园小区	108.932	34.1424
西安市长安区郭杜街道乳庄小学	陕西省西安市长安区郭杜街道乳庄村	108.755	34.2339
西安市长安区第七中学	陕西省西安市长安区斗门街道东街8号	108.762	34.2175
西安市长安区马王街道中心学校	陕西省西安市长安区马王镇沣桥街20号	108.725	34.2028
陕西省长安师范学校附属小学	陕西省西安市长安区韦曲镇局连村	108.972	34.1314
陕西省西咸新区沣东新城第五小学	陕西省西咸新区沣东新城征和三路	108.798	34.2815
西安高新区第九初级中学	陕西省西安市长安区长安区高新区灵秀西路	108.907	34.1587
西安沣东第六小学	陕西省西安市汉池路与昆明十六路交汇处西北角	108.794	34.2312
西安市长安区第四中学	陕西省西安市长安区细柳街道中段	108.795	34.1552
西咸新区沣西新城文教园第一小学	陕西省西咸新区沣西新城英秀三路	108.727	34.2488
西安市长安区郭杜街道初级中学	陕西省西安市长安区郭杜街道西街14号	108.597	34.1079
西安市长安区滦镇街道泉子头初级中学	陕西省西安市长安区滦镇街道泉子头村	108.848	34.0876
西安市长安区灵沼街道中心学校	陕西省西安市长安区灵沼街道里兆渠甲字6号	108.731	34.1582
西安市长安区五星街道中心学校	陕西省西安市长安区五星街道刘家堡甲字1号	108.796	34.0931
西安市长安区王莽街道韦兆初级中学	陕西省西安市长安区王莽乡韦一村301号	109.069	34.0734
西安市长安区高桥乡中心学校	陕西省西安市长安区高桥乡曹坊村	108.717	34.247
西安市长安区引镇街道白道峪小学	陕西省西安市长安区引镇白道峪村	109.102	34.092
西咸新区沣西新城创新港小学（创新港西安交通大学附属小学）	陕西省西咸新区沣西新城中国西部科技创新港南洋东院	108.657	34.2552
西安市长安区斗门街道中心学校	陕西省西安市长安区斗门街道西街76号	108.756	34.2172
西安市长安区第十二中学	陕西省西安市长安区马王街道大原村甲子4号	108.709	34.1938
西安市长安区东大街道祥峪九年制学校	陕西省西安市长安区东大街道罗汉洞村	108.784	34.0281
西安市长安区马王街道新旺小学	陕西省西安市长安区马王街道新旺村	108.725	34.1848
西安市长安区第六中学	陕西省西安市长安区引镇街道北街23号	109.102	34.0844
西安市长安区韦曲街道塔坡小学	陕西省西安市长安区韦曲街道办事处上塔坡村	108.931	34.1633
西安市长安区马王街道新庄小学	陕西省西安市长安区马王街道新庄村	108.682	34.2154
西安市长安区第六小学	陕西省西安市长安区韦曲街道上塔坡村甲字2号	108.931	34.1633
西安西京初级中学	陕西省西安市长安区西京路1号	108.934	34.1435
西安市长安区细柳街道义井九年制学校	陕西省西安市长安区细柳街道义井村东	108.767	34.1691
西安市航天城第一中学	陕西省西安市长安区航天基地航拓路与神舟六路十字西北角	108.99	34.1642
西安市长安区东大街道庆镇小学	陕西省西安市长安区东大街道庆镇村	108.759	34.0769
西安市长安区高桥街道马务小学	陕西省西安市长安区高桥乡马务村	108.716	34.2295
西安湖滨中学	陕西省西安市长安区子午大道与学府大街十字西南角	108.904	34.1467
西安市长安区马王街道大原小学	陕西省西安市长安区马王街道大原村	108.709	34.1938
西安市长安区斗门街道办事处先锋小学	陕西省西安市长安区斗门街道先锋村白家巷	108.82	34.2049
西安市长安区灵沼街道阿底村小学	陕西省西安市长安区灵沼街道阿底村	108.746	34.1359
西安市长安区五台街道东五联合小学	陕西省西安市长安区五台街道西甘村	108.982	34.04
西安市长安区魏寨街道初级中学	陕西省西安市长安区魏寨街道西坡村甲子5号	109.173	34.1056
西安市长安区五台街道初级中学	陕西省西安市长安区五台街道留村	108.972	34.0355
西安市长安区东大街道中心学校	陕西省西安市长安区东大街道东大村中心街1号	108.772	34.0428
西安市长安区东大街道初级中学	陕西省西安市长安区东大镇街道	108.9	34.0899
西安市长安区引镇街道光辉小学	陕西省西安市长安区引镇街道光辉村	109.086	34.1162
西安市长安区杨庄街道石佛庄小学	陕西省西安市长安区杨庄街道石佛庄村	109.158	34.026
陕西省西咸新区沣东新城第六初级中学	陕西省西咸新区沣东新城斗门街办镐京大道3号	108.786	34.2388
西安市长安区砲里街道中心学校	陕西省西安市长安区砲里街道砲里村	109.142	34.1664
西安市灞桥区李家小学	陕西省西安市灞桥区李家村63号	109.092	34.4248
西安西港花园学校	陕西省西安市灞桥区新筑街道办	109.084	34.3612
西安市灞桥区长乐坡中心小学	陕西省西安市灞桥区长乐坡村108号	109.03	34.2738
陕西省电子信息学校	陕西省陕西省西安市灞桥区纺渭路975号	109.076	34.3207
西安市灞桥区新筑中心小学	陕西省西安市灞桥区港务区灞耿路3521号	109.07	34.3708
西安国际港务区铁一中陆港初级中学	陕西省西安市灞桥区奥体大道	109.033	34.3805
西安国际港务区陆港初级中学	陕西省西安市灞桥区和顺路与港润路交叉口南180米	109.047	34.3811
西安市灞桥区贺韶小学	陕西省西安市灞桥区新筑街道办事处贺韶村委会	109.082	34.3737
西安国际港务区铁一中陆港高级中学	陕西省西安市国际港务区秦汉大道以南杏渭路以西	109.039	34.3611
西安市灞桥区党家中心小学	陕西省西安市灞桥区新合街	109.065	34.2731
西安国际陆港第二小学	陕西省西安市灞桥区潘骞路以南新筑环线以东新筑新城小区东侧	109.048	34.3805
西安滨河学校	陕西省西安市灞桥区灞丰二路1号	109.081	34.2922
西安市半坡初级中学	陕西省西安市灞桥区半坡路与纺八路交叉口西北140米	109.063	34.2535
西安南湖博苑综合职业高中	陕西省西安市灞桥区秦汉大道与纺渭路十字向南一公里路东	109.084	34.4012
西安市第七十七中学	陕西省西安市灞桥区新合街办水流村	109.05	34.4129
西安市灞桥区东枣园小学	陕西省西安市灞桥区鹿原街南段99号	109.075	34.2667
西安市第六十五中学	陕西省西安市灞桥区鹤翔路与西韩公路交叉口西北方向130米	109.107	34.4126
西安市灞桥区三里小学	陕西省西安市灞桥区三里小学(087村道北)	109.096	34.3658
西安市浐灞第十八小学	陕西省西安市灞桥区席王街道办事处柳巷村	109.065	34.3015
西安市灞桥区惠王中心小学	陕西省西安市灞桥区惠西村	109.114	34.2875
西安市灞桥区职业教育中心	陕西省西安市灞桥区红旗街办三殿村育才路	109.061	34.2331
西安市灞桥区东城第一小学五星分校	陕西省西安市灞桥区半引路与韩森东路向南300米	109.054	34.2603
西安市第四十七中学	陕西省西安市灞桥区陕西省西安市灞桥区职业教育中心	109.06	34.2339
西安市灞桥区邵平店小学	陕西省西安市灞桥区邵平店	109.087	34.3111
西安市第六十二中学	陕西省西安市灞桥区白鹿原中心小学对面	109.007	34.4648
西安市第六十三中学	陕西省西安市灞桥区东侯村	109.133	34.2709
西安市灞桥区纺织城小学灞柳分校	陕西省西安市灞桥区东城大道附近	109.067	34.3008
西安市灞桥区纺织城小学	陕西省西安市灞桥区纺织城东街281号	109.067	34.2689
西安市灞桥区老洞中心小学	陕西省西安市灞桥区毛西公路	109.098	34.2698
西安市灞桥区江尹小学	陕西省西安市灞桥区狄寨街道办事处江村委会	109.104	34.2387
西安市灞桥区四清小学	陕西省西安市灞桥区狄寨街道张李村四组33号	109.087	34.2286
西安市灞桥区灞桥小学	陕西省西安市灞桥区泽柳路与规划路交叉口东南320米	109.083	34.3078
西安市东城第一中学	陕西省西安市灞桥区纺四路236号	109.063	34.2643
西安市灞桥区东城第六小学	陕西省西安市灞桥区柳莺路与灞丰二路十字东北角	108.209	34.1704
西安市第五十五中学	陕西省西安市灞桥区东郊纺织城纺建路151号	109.064	34.2749
西安国际港务区铁一中陆港小学	陕西省西安市灞桥区抱朴路与扬帆路交叉口东140米	109.023	34.386
西安市浐灞第六小学	陕西省西安市灞桥区玄武东路与广运潭大道交叉口东280米	109.024	34.3045
西安市鹿原中学	陕西省西安市灞桥区白鹿塬站点张李村	109.087	34.2286
西安市第三十四中学	陕西省西安市灞桥区华清东路162号	109.009	34.2877
西安市灞桥区赵庄小学	陕西省西安市灞桥区赵东洪庆街(洪庆地铁站C东南口步行410米)	109.118	34.3163
西安市灞桥区王村小学	陕西省西安市灞桥区纺园四路与灞柳五路交叉口东北420米	109.127	34.282
西安市第七十九中学	陕西省西安市灞桥区西安市第八十三中学浐灞第二分校	109.028	34.2909
西北核技术研究院子女学校	陕西省西安市灞桥区灞桥街道办事处朝阳社区居委会	109.131	34.323
西安市庆华中学	陕西省西安市灞桥区田洪正街158号-172号	109.118	34.2903
西安市浐灞第十一小学	陕西省西安市灞桥区浐河东路与咸宁西路交汇处北侧500米	109.037	34.2864
西安市灞桥区纺织城小学高科分校	陕西省西安市灞桥区纺渭路294号	109.075	34.3011
西安交通职业学校	陕西省西安市灞桥区水安路168号	109.08	34.2333
西安市浐灞第七小学	陕西省西安市灞桥区御锦二路169号	109.05	34.2817
西安市灞桥初级中学	陕西省西安市灞桥区G3002西安绕城高速与田王立交交叉口西南340米	109.095	34.2926
西安新高教职业高中	陕西省西安市灞桥区水安路29号	109.083	34.2349
西安市灞桥区李家堡小学	陕西省西安市灞桥区李家堡社区	109.029	34.3006
西安市灞桥区纺织城小学富力分校	陕西省西安市灞桥区纺园五路与灞柳二路交叉路口往西约150米	109.122	34.2725
西安市灞桥区十里铺小学	陕西省西安市灞桥区华清东路228号2楼	109.03	34.2891
西安国际港务区高新一中陆港中学	陕西省西安市灞桥区国际港务区港丰路与榴花路交汇处	109.057	34.3654
西安市第八十一中学	陕西省西安市灞桥区狄寨迷鹿村正南方向160米	109.151	34.1863
西安市灞桥区漕渠小学	陕西省西安市灞桥区新合乡米家堡五组	109.095	34.3952
西安市灞桥区迷村小学	陕西省西安市灞桥区第八十一中学	109.16	34.1876
西安虹途职业高中	陕西省西安市灞桥区柳鸣路35号	109.069	34.2826
西安国际港务区高新一中陆港小学	陕西省西安市灞桥区西安国际港务区港丰路与榴花路交汇处金地玖峯汇南侧	109.025	34.3697
西安市灞桥区东城第三小学	陕西省西安市灞桥区纺七路15号	109.064	34.2558
西安国际陆港第四小学	陕西省西安市灞桥区国际港务区	109.039	34.3611
西安市灞桥区庆华小学	陕西省西安市灞桥区田洪正街	109.121	34.2837
西安市浐灞第三十二小学	陕西省西安市灞桥区黄邓路	109.048	34.333
西安市灞桥区白鹿原中心小学	陕西省西安市灞桥区狄寨街道办事处	109.117	34.2093
西安市第五十六中学	陕西省西安市灞桥区席王街办杨圪塔村灞陵路	109.113	34.2618
西安市浐灞第八小学	陕西省西安市灞桥区新岛路以南香湖湾二路以西	109.065	34.3351
西安市浐灞第十小学	陕西省西安市灞桥区十里铺北路米家崖小区	109.024	34.2936
西安市五环中学	陕西省西安市灞桥区东郊纺织城纺六路126号	109.066	34.2583
西安市灞桥区三殿中心小学	陕西省西安市灞桥区红旗街道办事处三殿村委会	109.056	34.2306
西安市浐灞第二十三小学	陕西省西安市灞桥区张家坡路1号	109.035	34.2561
西安市灞桥区务庄中心小学	陕西省西安市灞桥区灞桥街道务庄村	109.063	34.3459
西安市灞桥区席王中心小学	陕西省西安市灞桥区席王路901号	109.065	34.2878
西安市灞桥区神鹿坊小学	陕西省西安市灞桥区神鹿坊村12组	109.062	34.2101
灞桥区黄河锦绣小学	陕西省西安市灞桥区半引路合能十里锦绣	109.055	34.2289
西安市浐灞御锦城小学	陕西省西安市灞桥区东三环与东三环入口交汇处西150米	109.049	34.2908
西安市灞桥区湾子小学	陕西省西安市灞桥区红旗街道办事处湾子村委会	109.058	34.2188
西安国际陆港第一小学	陕西省西安市灞桥区国际港务区北三环杏园立交西北角陆港金海岸北门马路对面	109.019	34.3615
西安市灞桥区高桥小学	陕西省西安市灞桥区红旗乡高桥村	109.066	34.196
西安市灞桥区斡耳朵小学	陕西省西安市灞桥区十里铺街道办事处老人仓村委会	109.009	34.2994
西安市灞桥区东城第二小学	陕西省西安市灞桥区纺二路与纺织城东街交叉口西100米	109.066	34.2718
西安市浐灞实验小学	陕西省西安市灞桥区世博大道6820号	109.031	34.3463
西安市灞桥区热电小学	陕西省西安市灞桥区电厂东路	109.058	34.2822
西安铁一中滨河高级中学	陕西省西安市灞桥区灞丰二路1号	109.081	34.2922
西安思源中学	陕西省西安市灞桥区东郊水安路26号	109.077	34.2312
西安市灞桥区狄寨小学	陕西省西安市灞桥区狄寨镇狄寨街5组	109.092	34.2276
西安市灞桥区华清路小学	陕西省西安市灞桥区十里铺街道酒十路88号	109.023	34.3
西安市灞桥区古都希望中心小学	陕西省西安市灞桥区灞桥街道读书村	109.074	34.3292
西安市第十九中学	陕西省西安市灞桥区田洪正街254~338号	109.118	34.2899
西安市第五十七中学	陕西省西安市灞桥区世博大道香湖湾村2号	109.065	34.336
西安市灞桥区高新一小麓湾小学	陕西省西安市灞桥区东三环路高科麓湾国际社区北侧约100米	109.052	34.2284
西安国际港务区实验中学	陕西省西安市灞桥区国际港务区港务大道9号	109.068	34.3794
西安市灞桥区东城第一小学	陕西省西安市灞桥区纺三路198号	109.062	34.2671
西安华清园实验小学	陕西省西安市灞桥区十里铺酒十路88号	109.023	34.3
西安市灞桥区官厅小学	陕西省西安市灞桥区席王乡老官厅村111号	109.052	34.2941
西安市灞桥区石佛寺小学	陕西省西安市灞桥区张牛路	109.083	34.2211
西安市灞桥区岳家沟小学	陕西省西安市灞桥区洪庆街道航天四院动力厂门口	109.132	34.3052
西安市浐灞第七初级中学	陕西省西安市灞桥区东城大道	109.067	34.3008
中国人民解放军火箭军工程大学附属小学	陕西省西安市灞桥区同心路2号	109.125	34.3153
西安市灞桥区豁口小学	陕西省西安市灞桥区108国道西100米	109.101	34.3223
西安市灞桥区延河小学	陕西省西安市灞桥区纺织城纺南路	109.044	34.2512
西安市灞桥区崇福寺小学	陕西省西安市灞桥区新合乡马寨村	109.103	34.4225
西安市灞桥区常家湾小学	陕西省西安市灞桥区常家湾	109.067	34.1806
西安铁道职业学校	陕西省西安市灞桥区洪庆街道朝阳工业园	109.118	34.2967
西安市灞桥区东城第五小学	陕西省西安市灞桥区半坡路	109.051	34.2655
西安浐灞龙湖小学	陕西省西安市灞桥区沁水路与高楼路交汇处南200米	109.037	34.2617
西安市高桥中学	陕西省西安市灞桥区半引路附近	109.052	34.2638
西安国际港务区陆港第七小学	陕西省西安市灞桥区水流路与鹤翔路东南角	109.019	34.4105
西安市宇航中学	陕西省西安市灞桥区洪庆街道办向阳北路二区	109.132	34.3057
西安市交大附中浐灞右岸学校	陕西省西安市灞桥区锦槐路与锦堤四路交叉口西北160米	109.04	34.3465
西安市东城第二学校	陕西省西安市灞桥区祥云路和柳雪路交汇西北	109.094	34.281
西安市浐灞第一中学	陕西省西安市灞桥区浐灞生态区世博东路3028号	109.061	34.3379
西安市灞桥区宇航小学	陕西省西安市灞桥区田王街特字1号	109.118	34.3014
西安市灞桥区东李小学	陕西省西安市灞桥区席王街道办东李村	109.144	34.2362
西安市灞桥区新建小学	陕西省西安市灞桥区西韩公路中段	109.101	34.3446
周至县新联初级中学	陕西省西安市周至县周哑路与马家庄村路交叉口东60米	108.098	34.1249
周至县二曲初级中学	陕西省西安市周至县农商街西口	108.223	34.1577
周至县楼观台九年制学校	陕西省西安市周至县108省道北50米	108.213	34.0599
周至县终南镇三联村小学	陕西省西安市周至县三联村村民委员会东侧190米	108.323	34.135
周至县尚村镇临川寺小学	陕西省西安市周至县尚村镇临川寺村	108.476	34.1701
周至县四屯镇苏村小学	陕西省西安市周至县高骆路与老南街交叉路口往北约190米	108.135	34.1561
周至县楼观镇上三清小学	陕西省西安市周至县楼观镇上三清村内	108.255	34.0901
周至县终南镇解村小学	陕西省西安市周至县老大路	108.402	34.13
周至县终南镇王才屯村小学	陕西省西安市周至县终南镇勒马村委会	108.367	34.1105
周至县集贤镇殿镇小学	陕西省西安市周至县殿镇村路	108.357	34.0806
周至县富仁镇恒州小学	陕西省西安市周至县富仁镇第二幼儿园东侧约70米	108.249	34.156
周至县富仁镇大寨子小学	陕西省西安市周至县南新街	108.221	34.1579
周至县辛家寨初级中学	陕西省西安市周至县北二街与北一街交叉口东300米	108.241	34.1509
周至县终南镇终南村小学	陕西省西安市周至县终南镇毓兴村	108.362	34.1471
周至县第一中学	陕西省西安市周至县二曲街道瑞光路115号	108.205	34.163
周至县马召镇富饶小学	陕西省西安市周至县马召镇西富饶村	108.208	34.1193
周至县九峰镇二联小学	陕西省西安市周至县二联村	108.432	34.1147
周至县哑柏镇六屯小学	陕西省西安市周至县哑柏镇六屯村2组	108.117	34.1761
周至县新区初级中学	陕西省西安市周至县水街水上免费竞技区东侧240米	108.217	34.1435
周至县尚村镇龚家庄小学	陕西省西安市周至县尚九路路口	108.43	34.1108
周至县竹峪镇育芳爱心小学	陕西省西安市周至县竹峪镇谭家寨村委会	108.013	34.1524
周至县九峰镇中心小学	陕西省西安市周至县九峰镇甘午村	108.431	34.0982
西安西京职业高级中学	陕西省西安市周至县进财道1号	108.368	34.0804
周至县广济镇永红小学	陕西省西安市周至县广济镇永红村	108.169	34.1255
周至县九峰镇虎峰小学	陕西省西安市周至县九峰镇虎峰村委会	108.439	34.0603
周至县富仁镇渭兴小学	陕西省西安市周至县富仁镇渭兴村	108.272	34.1849
周至铸才初级中学	陕西省西安市周至县尚村镇新民村	108.467	34.1356
周至县终南镇竹园头村小学	陕西省西安市周至县终南镇长杨村委会	108.36	34.1472
周至县集贤镇中心小学	陕西省西安市周至县集贤初级中学附近	108.387	34.0817
周至县四屯镇下侯小学	陕西省西安市周至县侯家村镇下侯	108.191	34.1726
周至县广济初级中学	陕西省西安市周至县270乡道附近	108.164	34.1785
周至县哑柏镇五联小学	陕西省西安市周至县哑柏镇五联村	108.093	34.1916
周至县四屯镇东风小学	陕西省西安市周至县四屯镇东风村	108.176	34.1506
周至县哑柏镇景联小学	陕西省西安市周至县景联村内	108.103	34.1808
周至县第七中学	陕西省西安市周至县-中心东街31号	108.225	34.1604
周至县终南镇豆村小学	陕西省西安市周至县-中一路与中二路交叉口东100米	108.345	34.1333
周至县终南镇新村小学	陕西省西安市周至县新村附近	108.222	34.1636
周至县二曲街道八一小学	陕西省西安市周至县瑞光路121号东侧	108.203	34.1633
周至县第六中学	陕西省西安市周至县尚村社区	108.468	34.1559
周至县西周初级中学	陕西省西安市周至县终南镇豆村西路口	108.345	34.1341
周至县司竹镇北淇小学	陕西省西安市周至县司竹镇枣林北街与枣林南街交叉口东南方向180米	108.286	34.1543
周至县富仁镇新农小学	陕西省西安市周至县富仁镇新农村委会	108.376	34.1796
周至县二曲街道边墙号小学	陕西省西安市周至县二曲街道逸夫小学附近	108.217	34.1623
周至县哑柏镇仰天小学	西安市陕西省西安市周至县-哑柏镇北正街7号G310与Y275交叉口西南方向590米	108.097	34.1816
周至县终南镇东大坚村小学	陕西省西安市周至县终南镇大坚村委会	108.36	34.1472
周至县广济镇中心小学	陕西省西安市周至县广济村	108.152	34.1136
周至县楼观镇焦镇小学	陕西省西安市周至县楼观镇	108.304	34.0857
周至县第四中学	陕西省西安市周至县广济镇广济社区周哑路第四中学	108.155	34.1119
周至县尚村镇中心小学	陕西省西安市周至县围墙村附近	108.472	34.1511
周至县青化镇中心小学	陕西省西安市周至县310国道北50米	108.1	34.1812
周至县广济镇南留小学	陕西省西安市周至县广济镇南留村委会	108.114	34.1129
周至县第五中学	陕西省西安市周至县楼观镇焦镇村	108.303	34.0911
周至中学	陕西省西安市周至县108国道北50米	108.467	34.1551
周至县哑柏镇联星小学	陕西省西安市周至县康竹路联星村内	108.134	34.208
周至县哑柏镇上阳化小学	陕西省西安市周至县哑柏镇阳化社区	108.097	34.1816
周至县司竹镇中心小学	陕西省西安市周至县310国道与司肖路交叉口东440米	108.28	34.1563
周至县马召镇金盆小学	陕西省西安市周至县马召镇金盆村	108.212	34.0675
周至县尚村镇神灵寺小学	陕西省西安市周至县连共线	108.222	34.1636
周至县长杨初级中学	陕西省西安市周至县长杨中学(108国道南)	108.222	34.1636
周至县临川寺初级中学	陕西省西安市周至县临川寺村北一路西段21号	108.476	34.1701
周至县四屯镇侯家村中心学校	陕西省西安市周至县310国道南50米	108.094	34.1811
周至县司竹镇王唐小学	陕西省西安市周至县司竹镇李家庄	108.272	34.1626
周至县青化镇杏元小学	陕西省西安市周至县青化镇青竹一路西杏园小学(青化中学旁)	108.061	34.1892
周至县哑柏新区九年制学校	陕西省西安市周至县哑柏镇裕盛村北大街中段	108.092	34.2223
周至县终南镇老堡子村小学	陕西省西安市周至县北二街	108.24	34.1519
周至县哑柏初级中学	陕西省西安市周至县108国道	108.212	34.1955
周至县富仁镇五合小学	陕西省西安市周至县富仁镇五合村	108.243	34.1637
周至县二曲街道中心学校	陕西省西安市周至县农商街西口二曲中学	108.203	34.1587
周至县职业教育中心	陕西省西安市周至县尚村镇	108.469	34.1551
周至县富仁镇渭丰小学	陕西省西安市周至县富仁镇渭丰村	108.298	34.1842
周至县翠峰镇清河小学	陕西省西安市周至县翠峰镇刘家寨村	108.102	34.1381
周至县楼观镇大玉小学	陕西省西安市周至县油鹿路	108.304	34.1055
周至县富仁镇永流小学	陕西省西安市周至县富仁镇永流村四组	108.223	34.1858
周至县集贤镇永新希望小学	陕西省西安市周至县集贤镇马滩村	108.403	34.1096
周至县第三中学	陕西省西安市周至县终南镇	108.36	34.1472
周至县楼观镇界尚小学	陕西省西安市周至县楼观镇界尚村	108.314	34.1169
周至县四屯镇渭滨小学	陕西省西安市周至县267乡道	108.195	34.2003
周至县终南镇马庞寨小学	陕西省西安市周至县马蓬村	108.394	34.1311
周至县广济镇南大坪小学	陕西省西安市周至县广济镇南大坪村	108.151	34.0854
周至县鹿马初级中学	陕西省西安市周至县楼观镇	108.304	34.0857
周至县西岩坊初级中学	陕西省西安市周至县尚村镇尚九路	108.43	34.1108
周至县富仁镇三高小学	陕西省西安市周至县上三高村内	108.242	34.1316
周至县四屯镇联三小学	陕西省西安市周至县四屯镇联三村	108.167	34.1998
周至县翠峰镇陈家村小学	陕西省西安市周至县翠峰镇陈家村东堡东大街	108.089	34.1392
周至县育英学校	陕西省西安市周至县二曲镇棉花营	108.208	34.1318
周至县司竹初级中学	陕西省西安市周至县司竹镇司竹初中	108.297	34.1525
周至县竹峪初级中学	陕西省西安市周至县竹峪镇青竹二路东50米兰梅塬村	108.037	34.1498
周至县九峰镇沙云小学	陕西省西安市周至县九峰镇沙云屯村委会	108.415	34.1203
西安高新区第五高级中学	陕西省西安市周至县Y259与振兴路交叉路口往西北约180米	109.199	34.6588
周至县集贤镇金凤小学	陕西省西安市周至县严金路	108.381	34.0881
周至县终南镇双明村小学	陕西省西安市周至县终南镇东二巷20号	108.36	34.1472
周至县楼观镇东楼小学	陕西省西安市周至县天干道与仙都西路交叉路口往西北约120米	108.325	34.0873
周至县翠峰镇农林小学	陕西省西安市周至县官农路	108.048	34.0934
周至县富仁镇富仁小学	陕西省西安市周至县富仁镇富仁村	108.382	34.1836
周至县九峰镇千户小学	陕西省西安市周至县高新区九峰镇甘午村	108.431	34.0982
周至县四屯初级中学	陕西省西安市周至县310国道与沿望路交叉口60m	108.147	34.1685
周至县集贤初级中学	陕西省西安市周至县集贤镇108省道北	108.404	34.0824
周至县马召镇知行小学	陕西省西安市周至县马召镇	108.207	34.0802
周至县楼观镇永合小学	陕西省西安市周至县楼观镇下三清村	108.264	34.0994
周至县马召初级中学	陕西省西安市周至县211县路与马广路交叉口南240米	108.15	34.1126
西安高新区第六学校	陕西省西安市周至县集贤产业园振兴路	108.386	34.0731
周至县哑柏镇中心小学	陕西省西安市周至县哑翠二路	108.088	34.1653
周至县九峰镇起良小学	陕西省西安市周至县起良村西安市起良蔡侯纸博物馆	108.452	34.1152
周至县尚村镇马村小学	陕西省西安市周至县渭王路附近	108.435	34.1741
周至县马召镇四府营小学	陕西省西安市周至县马召镇	108.207	34.0802
周至县马召镇纪联小学	陕西省西安市周至县马召镇郭家寨幼儿园东北侧约180米	108.23	34.1096
周至县青化镇联庄小学	陕西省西安市周至县青竹二路阳光童星幼儿园东侧约160米	108.027	34.1562
周至县四群初级中学	陕西省西安市周至县四群村	108.207	34.1053
周至县集贤镇六曲小学	陕西省西安市周至县刘家堡村	108.386	34.099
周至县永流初级中学	陕西省西安市周至县永流村四组	108.223	34.1858
周至县哑柏镇槐花小学	陕西省西安市周至县南三街与朝阳路交叉口正东方向1110米左右	108.62	34.104
周至县楼观镇鹿马小学	陕西省西安市周至县集贤镇胡下路与老大路交叉口东220米	108.401	34.1123
周至县马召镇红崖头小学	陕西省西安市周至县红兴村内	108.204	34.086
周至县青化镇兴隆小学	陕西省西安市周至县青化镇兴隆村委会	108.331	33.9812
周至县西宝初级中学	陕西省西安市周至县四屯镇三联村委会	108.323	34.135
周至县广济镇协里小学	陕西省西安市陕西省西安市周至县广济镇斜里村小北路	108.148	34.1295
周至县官村初级中学	陕西省西安市周至县翠峰镇官村	108.077	34.1277
周至县甘午初级中学	陕西省西安市周至县尚九路中段正西方向90米	108.43	34.1108
周至县尚村镇圪塔头小学	西安市陕西省西安市周至县圪塔头村内	108.452	34.1558
周至县富仁镇高庙小学	陕西省西安市周至县辛家寨镇	108.223	34.1399
周至县第二中学	陕西省西安市周至县哑柏镇	108.097	34.1816
周至县翠峰镇官村小学	陕西省西安市周至县翠峰镇官村	108.077	34.1277
周至县广济镇桑园小学	陕西省西安市周至县桑园村内	108.16	34.0983
周至县二曲街道南关小学	陕西省西安市周至县南辛寺头村	108.189	34.138
周至县双成学校	陕西省西安市周至县四屯镇渭洲村	108.191	34.1997
周至县尚村镇张屯小学	陕西省西安市周至县张屯村内	108.453	34.1351
周至县骆峪九年制学校	陕西省西安市周至县高骆路	108.143	34.1959
周至县九峰初级中学	陕西省西安市周至县九峰镇	108.43	34.0806
周至县马召镇焦家楼小学	陕西省西安市周至县焦家楼村内	108.22	34.0898
周至县楼观镇送军小学	陕西省西安市周至县楼观镇送军村委会	108.304	34.0857
周至县二曲街道渭中小学	陕西省西安市周至县二曲街道办事处渭中村委会	108.246	34.1836
周至县富仁镇建兴小学	陕西省西安市周至县富仁镇建兴村	108.349	34.1823
周至县青化初级中学	陕西省西安市周至县310国道与青竹一路交叉口西北260米	108.061	34.1843
周至县九峰镇永丰小学	陕西省西安市周至县九峰镇余永路	108.456	34.0616
周至县翠峰镇史务小学	陕西省西安市周至县翠峰镇史务村澳门希望小学附近	108.093	34.1143
周至县四屯镇中心小学	陕西省西安市周至县沿望路	108.149	34.176
周至县司竹镇南淇小学	陕西省西安市周至县南淇水内	108.308	34.133
周至县富仁镇辛家寨中心学校	陕西省西安市周至县北二街与北一街交叉口东300米	108.241	34.1509
周至县卡迪尔小学	陕西省西安市周至县上三清路与八姚路交叉口东200米	108.26	34.0941
周至县终南镇信民学校	陕西省西安市周至县西宝路297号	108.165	34.1653
周至县马召镇群联小学	陕西省西安市周至县群兴村内	108.195	34.1053
周至县青化镇新白寨小学	陕西省西安市周至县青化镇镇新白寨村	108.074	34.1895
周至县新区小学	陕西省西安市周至县南大街与瑞光寺路交叉口东160米	108.206	34.1521
周至县竹峪镇兰梅塬小学	陕西省西安市周至县竹峪镇兰梅塬村委会	108.036	34.1469
周至县实验中学	陕西省西安市周至县农商西街48号	108.208	34.1583
周至县二曲街道西街小学	陕西省西安市周至县老城西街64号	108.209	34.1637
周至县尚村镇张寨小学	陕西省西安市周至县尚村镇尚村张寨村	108.484	34.1937
周至县尚村镇西岩村小学	陕西省西安市周至县老城西街64号	108.209	34.1637
周至县司竹镇阿岔小学	陕西省西安市周至县司竹镇阿岔村委会	108.32	34.1642
周至县尚村镇涧里小学	陕西省西安市周至县尚村镇涧里村委会	108.423	34.1667
周至县华龙小学	陕西省西安市周至县广济镇小麦屯村委会	108.173	34.1202
周至县四屯镇清河小学	陕西省西安市周至县四屯镇清河村委会	108.183	34.1775
周至县竹峪镇岭梅小学	陕西省西安市周至县竹峪镇岭梅村委会	108.046	34.1354
周至县竹峪镇丹阳小学	陕西省西安市周至县竹峪镇丹阳村委会	108.043	34.1252
西安市经开第四学校	陕西省西安市未央区尚稷路与草滩八路交叉口东280米	108.866	34.3674
西安市凤景小学	陕西省西安市未央区凤城七路77号	108.934	34.3383
西安经开小天鹅小学	陕西省西安市未央区凤城三路35号	108.927	34.3231
西安市浐灞第三小学	陕西省西安市未央区矿山路海璟印象城A区临街	109.003	34.301
陕西省西安中学	陕西省西安市未央区经开区凤城五路69号	108.94	34.3303
西安经开第四小学	陕西省西安市泾渭新城纬六路以南,渭原北路以西	109.006	34.5023
西安经开第十一小学	陕西省西安市未央区凤城四路138号	108.927	34.3271
西安市宏景小学	陕西省西安市未央区凤城九路与文景路交汇处	108.938	34.3473
西安市西大附中浐灞中学	陕西省西安市浐灞生态区广运潭大道与浐灞二路十字西北角	108.997	34.3236
西安经开第十小学	陕西省西安市未央区张家堡街道办事处凤城四路8号	108.941	34.3264
西安大唐综合职业高中有限公司	陕西省陕西省西安市雁塔区丈八东路11号	108.933	34.1988
西安市经开第七中学	陕西省西安市未央区草滩街道办华山路一号	109.021	34.2679
西安经开第八小学	陕西省西安市未央区尚稷路与尚宏路东北口	108.918	34.383
陕西省西咸新区沣东新城第二初级中学	陕西省西咸新区沣东新城三桥街道阿房四路9号	108.838	34.2828
西安市经开第六中学	陕西省西安市未央区民经一路北段13号	108.923	34.3461
西安经开第十三小学	陕西省西安市未央区汉城街道办事处南党村	108.931	34.362
西安市经开第一中学	陕西省西安市未央区经济技术开发区草滩五路1001号	108.89	34.3781
西安市浐灞欧亚中学	陕西省西安市浐灞生态区金桥六路1111号	109.037	34.3196
西安经开第五小学	陕西省西安市未央区修业路376号	108.951	34.3495
西安市未央区阿房路三校	陕西省西安市未央区阿房二路	108.85	34.2733
西咸新区沣东新城耀华小学	陕西省西安市未央区天台三路1号	108.825	34.2662
西咸新区沣东新城第九小学	陕西省西咸新区沣东新城三桥街道征和八路与太定路十字西北角	108.801	34.2955
西安市浐灞第十学校	陕西省西安市未央区浐灞生态区启源二路与广运潭大道交汇处西南角	109.023	34.3454
西安高新一中沣东中学	陕西省西安市未央区和平工业园红光路段1号	108.85	34.2605
西安沣东第二小学	陕西省西安市沣东新城三桥街道孙围墙村十字南侧	108.816	34.31
西安高新一中沣东中学初中校区	陕西省西安市未央区和平工业园红光路段1号	108.85	34.2605
西安市西城中学	陕西省西安市莲湖区大庆路985号	108.858	34.2691
西安市未央区阿房路一校	陕西省西安市未央区阿房二路西纺一村	108.85	34.2733
西咸新区铁一中金湾中学	陕西省咸阳市秦都区沣泾大道以西金融东路以东能源北路以南能源四路以北	108.76	34.267
西安市第六十八中学	陕西省西安市未央区三桥街道办事处后围寨村	108.815	34.295
西咸新区沣东新城第八小学	陕西省西咸新区天章大道与孙武路交叉口西北角	108.823	34.3062
西安市浐灞一小创新分校	陕西省西安市未央区浐灞二路以南北辰东路以西	109.002	34.3214
西安市未央区太康路小学	陕西省西安市未央区太元路中段路南太元路	108.985	34.3002
西安经开第九小学	陕西省西安市未央区凤城二路50号	108.925	34.3175
西安市经开第五中学	陕西省西安市未央区凤城四路与明光路交汇处西北角	108.93	34.3271
西安市经开第二学校	陕西省西安市未央区经开区凤城北路1号	108.946	34.2987
西安市浐灞第三十小学	陕西省西安市未央区广大门村什字街东	109.018	34.3243
西安市经开第三中学	陕西省西安市高陵区泾渭路与泾环北路交汇处东北500米	109.001	34.5017
西安经开第十七小学	陕西省西安市未央区长青一路14号	108.947	34.2931
西安市经开第五学校	陕西省西安市未央区尚林路1088号	108.91	34.3857
西安市未央区五一小学	陕西省西安市未央区三桥街道办事处建章路南段72号	108.842	34.306
陕西省西咸新区沣东新城和平小学	陕西省西咸新区沣东新城和平村工业园2路	108.783	34.2591
西安东方美术职业高中	陕西省西安市长安区子午大道35号	108.898	34.0845
西安市浐灞第一小学	陕西省西安市未央区浐灞一路1881号	109.006	34.3182
西安经开第三小学	西安经济技术开发区草滩生态产业园文景路666号	108.86	34.3602
西安沣东第三小学	陕西省西安市丰产路西段72号	108.828	34.3305
西安沣东实验小学	陕西省西安市沣东新城昆明路西延线11号	108.819	34.2894
西安市未央区华远海蓝城小学	陕西省西安市未央区玄武东路	109.009	34.3049
西安市第五十中学	陕西省西咸新区沣东新城建章路北段7号	108.844	34.3207
西安市浐灞第四小学	陕西省西安市欧亚七路366号	109.005	34.3555
西安市经开第一学校	陕西省西安市经济技术开发区凤城十路118号	108.948	34.3524
西安经开第六小学	陕西省西安市未央区草滩一路1号	108.912	34.3765
西安市未央区阿房路二校	陕西省西安市未央区阿房四路6号副1号	108.849	34.2824
西安经开职业学校	陕西省西安市未央区尚稷路6369号	108.88	34.3726
西安市浐灞第二十六小学	陕西省西安市未央区谭家街道办事处滹沱村	108.967	34.3418
西安市浐灞第二十九小学	陕西省西安市未央区欧亚大道	109.039	34.3601
西安沣东阿房路学校	陕西省西安市未央区三桥镇北何村	108.843	34.2818
西安市未央区焦家村小学	陕西省西安市未央区建章路北段9号	108.842	34.3187
西安市未央区关庙小学	陕西省西安市未央区红光路三桥街道办贺家村369号	108.85	34.2621
西安经开第二小学	陕西省西安市高陵区西安经济技术开发区泾渭工业园泾环南路5号	108.998	34.4627
西安经开第十五小学	陕西省西安市未央区草滩镇草二村	108.975	34.3889
西安市未央区后围寨小学	陕西省西安市未央区三桥街道办事处后围寨村	108.815	34.295
西安经开第十四小学	陕西省西安市未央区长乐东苑C区	108.953	34.373
西咸沣东金河湾小学	陕西省咸阳市秦都区西咸新区沣东新城扶苏路亿龙金河湾小区东侧	108.775	34.2626
西安市未央区第一学校	陕西省西安市未央区北辰大道与启源四路西南角	108.991	34.4102
西安市第一实验学校	陕西省西安市未央区龙朔南路河址西社区18排对面	108.957	34.3583
西安经开第十二小学	陕西省西安市未央区凤城九路136号	108.922	34.3475
陕西省西咸新区沣东新城第四小学	陕西省西咸新区沣东新城三桥街道天台路与征和六路交汇处	108.821	34.2898
西安市未央区博达小学	陕西省西安市未央区袁雒村北	109	34.358
西安市创新港中学（创新港西安交通大学附属中学）	陕西省咸阳市秦都区咸户路G30号	108.679	34.2513
西安市车辆中学	陕西省西安市未央区西咸新区沣东新城三桥建章路47号	108.842	34.2993
西安市浐灞第十七小学	陕西省西安市未央区夏家堡107	108.999	34.3861
西安市浐灞第十五小学	陕西省西安市未央区辛家庙街道办事处新房村	109.021	34.3118
西安市未央区车辆小学	陕西省西安市未央区建章路155号	108.842	34.3047
西安经开第一小学	陕西省西安市未央区草滩四路1000号	108.893	34.3801
西安市未央区三桥街小学	陕西省西安市未央区三桥街道办事处王家门100号	108.838	34.2908
中国人民武装警察部队工程大学附属子女学校	陕西省西安市未央区阿房二路与宜家路交叉口东120米	108.85	34.2733
西安市未央区阿房宫小学	陕西省西安市未央区三桥街道办事处阿房宫村阿房一路108号	108.827	34.2684
西安市浐灞第二中学	陕西省西安市浐灞大道3785号	109.021	34.3153
西安市经开第二中学	西安经济技术开发区泾渭工业园	109	34.4814
西安泾河工业区中心学校	陕西省西安市高陵区泾渭街办泾渭中路	108.987	34.4475
西安市浐灞第二小学	陕西省西安市浐灞生态区金桥六路1769号	109.037	34.3197
西安市汉都新苑中学	陕西省西安市未央区北三环罗高路88号	108.892	34.351
西安市未央区西航四校	陕西省西安市未央区徐家湾文体路5号	108.967	34.352
西安经开经新小学	陕西省西安市经开区凤城七路西口29号	108.925	34.3379
长庆泾渭小学	陕西省西安市高陵区泾环南路南	109.007	34.4608
西安市未央区大白杨小学	陕西省西安市未央区未央宫街道大白杨西村	108.908	34.3008
西安市第六十六中学	陕西省西安市未央区尤西路7号	108.943	34.3278
西安市未央区讲武殿小学	陕西省西安市未央区讲北村东段201号	108.887	34.3133
西安市未央区汉都新苑第一小学	陕西省西安市未央区朱宏路389号汉都新苑小区内	108.907	34.3613
西安市未央区兴丰路小学	陕西省西安市未央区未央宫街道办事处兴丰路中段2号	108.901	34.2948
西安市未央区长乐第二小学	陕西省西安市未央区草滩一路长乐西苑	108.916	34.3723
西安市东元路学校	陕西省西安市东元路226号	108.994	34.3066
西安市第四十八中学	陕西省西安市未央区辛家庙太元路68号	108.974	34.3013
西安凤凰城初级中学	陕西省西安市未央区未央湖街道灞浦二路2099号	108.986	34.3743
西安市未央区百花小学	陕西省西安市未央区百花村82号	108.975	34.326
西安市汉都第一学校	陕西省西安市未央区丰产路12号	108.875	34.3399
西安市未央区永泰路小学	陕西省西安市未央区御井路与云庆路交叉口东南80米	108.989	34.3149
西安市未央区华远君城小学	陕西省西安市未央区太元路中段	108.959	34.313
西安市未央区三官庙小学	陕西省西安市未央区汉城街道办事处三官庙村	108.918	34.3527
西安市未央区徐寨小学	陕西省西安市未央区石化大道中段12号	108.873	34.323
西安市长庆未央湖学校	陕西省西安市未央区未央湖东风路99号	108.992	34.3933
长庆二中	陕西省西安市高陵区泾渭街道泾环南路1824号	109.019	34.4627
西安市西航二中	陕西省西安市未央区徐家湾街道办渭清路12号	108.968	34.3471
西安市未央区永隆路小学	陕西省西安市未央区永隆路与行舍路交叉口西40米	108.981	34.3115
西安高级中学	陕西省西安市未央区崇文路559号	108.97	34.3442
西安市未央区范家小学	陕西省西安市未央区明光路纬三十一街西段	108.936	34.3082
西安锦园中学	陕西省西安市未央区北二环锦园新世纪花园社区内	108.965	34.3087
西安经开第十九小学	陕西省西安市经开区泾渭新城渭华路中段西安经开第十九小学	108.99	34.4713
西安市未央区实验学校	陕西省西安市未央区御井路与永隆路交叉口北100米	108.989	34.3149
西安市太元路学校	陕西省西安市未央区辛家庙街道太元路1号	108.995	34.3017
西安市未央区玄武路小学	陕西省西安市未央区朱宏路8号	108.924	34.3073
西安市未央区团结小学	陕西省西安市未央区团结小学	108.947	34.2931
西安市西航一中	陕西省西安市未央区徐家湾街道渭滨东街一号	108.967	34.3533
西安市浐灞第十六小学	陕西省西安市未央区广运潭大道与北三环十字向南200米路西	109.004	34.3622
西安市第五十八中学	陕西省西安市未央区昭远门路与龙朔路十字东北角	108.96	34.3656
西安市未央区西航三校	陕西省西安市未央区凤城十路1号	108.923	34.3526
未央煜星春藤小学	陕西省西安市未央区永敏路369号	108.967	34.3197
西安市未央区西航二校	陕西省西安市未央区永平路12号	108.968	34.3397
西安浐灞阳光海蓝小学	陕西省西安市未央区华远海蓝城小区六期内	109.01	34.3076
西安市第七十五中学	陕西省西安市未央区玄武西路1666号	108.944	34.3063
西安市未央区三星小学	陕西省西安市未央区大明宫街道办事处岗家寨	108.836	34.2843
西安市汉都新苑中学	陕西省西安市未央区北三环罗高路88号	108.892	34.351
西安市未央区楼阁台小学	陕西省西安市未央区汉城街办楼阁台村	108.91	34.3426
西安市未央区新光小学	陕西省西安市未央区徐家湾街道办事处新光村	108.989	34.366
西安市未央区枣园小学	陕西省西安市未央区未央宫街道办事处枣园村	108.934	34.3008
西安市未央区雷寨小学	陕西省西安市未央区汉城街道办事处雷寨村	108.907	34.3215
西安市未央区新兴小学	陕西省西安市未央区未央湖街道办事处杜家堡村	108.968	34.3775
西安市第七十六中学	陕西省西安市未央区丰景路讲武殿北村15号	108.887	34.3133
西安市第十一中学	陕西省西安市未央区常青一路86号	108.947	34.2931
西安市未央区方新小学	陕西省西安市未央区凤城南路西段2-1号	108.942	34.3024
西安市未央区职业教育中心	陕西省西安市未央区未央宫街道办事处范家北村	108.926	34.306
西安市未央区开元小学	陕西省西安市未央区草滩街办吕小寨华宇时间城小区东门	108.962	34.3661
西安市未央区先锋小学	陕西省西安市未央区二环北路东段	108.968	34.3101
西安市未央区永顺路小学	陕西省西安市未央区浐灞一路与北辰大道交叉口西北	108.996	34.3171
西安未央锦园小学	陕西省西安市未央区北二环玄武路69号	108.967	34.3095
西安市未央区红旗小学	陕西省西安市未央区渭滨街99号	108.969	34.3436
西安市未央区大明宫小学	陕西省西安市未央区太华北路304号	108.969	34.315
西安市未央区南康小学	陕西省西安市未央区未央路111-6号	108.949	34.3077
西安市未央区汉都新苑第二小学	陕西省西安市未央区尚耕路回望路南10米路东	108.901	34.3602
西安市未央区车张小学	陕西省西安市未央区三桥街道办事处车张村西一街	108.821	34.2883
西安市未央区六村堡小学	陕西省西安市未央区六村堡街道办事处丰产西路32号	108.872	34.323
西安博爱学校	陕西省西安市未央区经济技术开发区尚稷路6369号	108.88	34.3726
西安市未央区王家棚小学	陕西省西安市未央区北辰大道与启源四路西南角	108.991	34.4102
西安市未央区东前进小学	陕西省西安市未央区太元路80号	108.988	34.3052
西安市第五十八中学	陕西省西安市未央区昭远门路与龙朔路十字东北角	108.96	34.3656
西安市第十七中学	陕西省西安市未央区团结村渭青路附近	108.994	34.3497
长庆八中	陕西省陕西省西安市未央区长庆兴隆园小区	108.954	34.3262
西安市浐灞第三初级中学	陕西省西安市未央区矿山路与广运潭西路交叉口西南120米	109.009	34.3101
西安市未央区杨善寨小学	陕西省西安市未央区汉城街道办事处东杨善寨村	108.915	34.3374
西安未央凤凰城小学	陕西省西安市未央区灞浦二路2099号	108.986	34.3743
蓝田县洩湖中学	陕西省西安市蓝田县洩湖镇沙河村	109.242	34.2079
蓝田县洩湖镇冯家村初级中学	陕西省西安市蓝田县洩湖镇曳湖镇	109.259	34.199
西安市田家炳中学	陕西省西安市蓝田县文化路55号	109.318	34.1599
蓝田县焦岱镇柳家湾小学	陕西省西安市蓝田县柳陈路	109.225	34.0707
蓝田县金山镇初级中学	陕西省西安市蓝田县临蓝路	109.379	34.2753
蓝田县前卫镇初级中学	陕西省西安市蓝田县孟吴路与前刘路交叉口北500米	109.226	34.1229
蓝田县九间房镇中心学校	陕西省西安市蓝田县下大寨村	109.517	34.1865
蓝田县三官庙镇高坪小学	陕西省西安市蓝田县三官庙镇	109.421	34.253
陕西省高教系统职业中等专业学校	陕西省西安市蓝田县东郊西北家具工业园新新港五路16号	109.16	34.2305
蓝田县三里镇中心学校	陕西省西安市蓝田县三里头村	109.315	34.1692
蓝田县玉山镇前程小学	陕西省西安市蓝田县玉山镇	109.497	34.1926
蓝田县职业教育中心	陕西省西安市蓝田县洩湖镇滋水路	109.339	34.1273
蓝田县教师进修学校附属小学	陕西省西安市蓝田县蓝关镇工农路1号	109.322	34.1501
蓝田县汤峪镇中心学校	陕西省西安市蓝田县汤峪镇聚庆村	109.194	34.0715
蓝田县蓝关街道大寨小学	陕西省西安市蓝田县107省道	109.313	34.1572
蓝田县育才学校	陕西省西安市蓝田县蓝关镇大寨村	109.332	34.1318
蓝田县史家寨镇初级中学	陕西省西安市蓝田县史家寨六组	109.15	34.0807
蓝田县玉山镇许庙初级中学	陕西省西安市蓝田县玉山镇	109.497	34.1926
蓝田县蓝关街道冯林寨小学	陕西省西安市蓝田县蓝关镇冯林寨村	109.386	34.128
蓝田县普化镇马楼初级中学	陕西省西安市蓝田县普化镇101省道附近	109.501	34.1877
蓝田县小寨镇初级中学	陕西省西安市蓝田县小寨镇田村2组	109.287	34.1802
蓝田县葛牌镇葛牌初级中学	陕西省西安市蓝田县葛牌镇镇街道	109.468	33.9584
蓝田县焦岱镇中心学校	陕西省西安市蓝田县焦岱柳家湾柳上路	109.24	34.0635
蓝田县玉山镇腰祝小学	陕西省西安市蓝田县玉山镇	109.497	34.1926
蓝田县孟村镇中心学校	陕西省西安市蓝田县孟村乡樊家村村民委员会北侧110米	109.223	34.1638
蓝田县华胥镇初级中学	陕西省西安市蓝田县华胥镇油坊街	109.189	34.2247
蓝田县汤峪镇史家寨完全小学	陕西省西安市蓝田县汤峪镇史家寨村委会	109.15	34.0807
蓝田县蓝关街道新寨小学	陕西省西安市蓝田县蓝关街道新寨村	109.362	34.1319
蓝田县孟村镇胡家小学	陕西省西安市蓝田县纺九路	109.31	34.1241
蓝田县北关实验学校	陕西省西安市蓝田县蓝新路中段	109.317	34.1584
蓝田县滋水学校	陕西省西安市蓝田县滨河东路与向阳路西段交叉口东280米	109.312	34.1543
蓝田县玉山中学	陕西省西安市蓝田县玉山镇曲子村	109.497	34.1926
蓝田县汤峪镇高堡初级中学	陕西省西安市蓝田县汤峪镇高堡村	109.216	34.0277
蓝田县三里镇文姬中学	陕西省西安市蓝田县文姬路	109.306	34.1749
蓝田县玉山镇中心学校	陕西省西安市蓝田县县东街	109.323	34.1513
蓝田县华胥镇中心学校	陕西省西安市蓝田县华胥镇	109.189	34.2247
蓝田县汤峪镇高堡小学	陕西省西安市蓝田县汤峪镇高堡村	109.216	34.0277
蓝田县城关中学	陕西省西安市蓝田县县体育路30号	109.319	34.1538
蓝田县孟村镇民生希望初级中学	陕西省西安市蓝田县孟村镇孟村街	109.225	34.1617
蓝田县辋川镇红门寺初级中学	陕西省西安市蓝田县辋川镇红门寺村一组	109.308	34.1637
蓝田县厚镇中心学校	陕西省西安市蓝田县厚张路与厚三路交叉口西400米	109.441	34.2416
蓝田县洩湖镇中心学校	陕西省西安市蓝田县101省道	109.501	34.1877
蓝田县兴华学校	陕西省西安市蓝田县蓝关镇蓝水路东段	109.328	34.1386
蓝田县洩湖镇冯家村小学	陕西省西安市蓝田县洩湖镇	109.259	34.2009
蓝田县普化镇中心学校	陕西省西安市蓝田县普化街69号	109.4	34.1556
蓝田县汤峪镇尖角小学	陕西省西安市蓝田县汤峪镇尖角村委会	109.22	34.0452
蓝田县普化镇韩河小学	陕西省西安市蓝田县普化镇韩河小学	109.458	34.174
蓝田县蓝桥镇泰中学	陕西省西安市蓝田县蓝桥镇蓝桥街村	109.464	34.0725
蓝田县三官庙镇中心学校	陕西省西安市蓝田县二马路	109.372	34.2102
蓝田县蓝桥镇中心学校	陕西省西安市蓝田县蓝桥镇蓝桥街村	109.464	34.0725
蓝田县安村镇白村初级中学	陕西省西安市蓝田县安村镇101	109.284	34.1363
蓝田县灞源镇初级中学	陕西省西安市蓝田县灞源镇上村	109.688	34.1482
蓝田县普化镇终南小学	陕西省西安市蓝田县普化镇穆家坡村	109.424	34.1535
蓝田县安村镇下白村小学	陕西省西安市蓝田县安村镇下白村委会	109.282	34.1444
蓝田县安村镇龙村小学	陕西省西安市蓝田县安村镇龙村委会	109.289	34.1292
蓝田县蓝关镇中心学校	陕西省西安市蓝田县东街31号	109.324	34.1466
蓝田县三里镇李后小学	陕西省西安市蓝田县三里镇李后村三组	109.313	34.157
蓝田县辋川镇初级中学	陕西省西安市蓝田县辋川镇沪陕高速公路	109.659	34.1506
蓝田县洩湖镇十里铺小学	陕西省西安市蓝田县洩湖镇十里铺	109.276	34.1921
蓝田县厚镇初级中学	陕西省西安市蓝田县厚镇南街村	109.513	34.2579
蓝田县葛牌镇草坪街小学	陕西省西安市蓝田县蓝葛路	109.417	34.0068
蓝田县汤峪镇肖家坡完全小学	陕西省西安市蓝田县汤峪镇肖家坡村委会	109.218	34.0224
温州工贸协会光彩学校	陕西省西安市蓝田县蓝关街道宣堡村二组	109.32	34.1118
蓝田县北关小学	陕西省西安市蓝田县北环路西段25号	109.315	34.1606
蓝田县厚镇梁锋小学	陕西省西安市蓝田县厚镇乡梁峰村	109.48	34.2879
蓝田县小寨镇小寨小学	陕西省西安市蓝田县小寨镇小寨村委会	109.514	34.1939
蓝田县焦岱中学	陕西省西安市蓝田县焦岱镇焦岱街道卫生院东行30米路南	109.242	34.0632
蓝田县洩湖镇初级中学	陕西省西安市蓝田县洩湖镇洩湖街	109.252	34.1997
蓝田县初级中学	陕西省西安市蓝田县文化路20号	109.321	34.1584
蓝田县三官庙镇初级中学	陕西省西安市蓝田县二马路	109.372	34.2102
蓝田县汤峪镇塘子小学	陕西省西安市蓝田县107省道	109.313	34.1572
蓝田县汤峪镇小寺完全小学	陕西省西安市蓝田县汤峪镇小寺村委会	109.163	34.0687
蓝田县汤峪镇石门小学	陕西省西安市蓝田县汤峪镇石门村委会	109.185	34.0838
蓝田县普化镇杨斜小学	陕西省西安市蓝田县普化镇杨斜村委会	109.398	34.1371
蓝田县汤峪镇东升完全小学	陕西省西安市蓝田县汤峪镇371村道	109.134	34.097
西安蓝田工业园高级中学	陕西省西安市蓝田县文姬路18号	109.307	34.172
蓝田县三里镇新庄小学	陕西省西安市蓝田县玉山路三里镇新庄小学	109.344	34.1475
蓝田县前卫镇吴村庙完全小学	陕西省西安市蓝田县前卫镇玉平路	109.254	34.1137
西安市白鹿原高级中学	陕西省西安市蓝田县101县道南150米	109.214	34.1662
蓝田县葛牌镇草坪初级中学	陕西省西安市蓝田县葛牌镇草坪村委会	109.42	34.0805
蓝田县三官庙镇惜惶岭小学	陕西省西安市蓝田县三官庙镇惜惶岭村	109.406	34.2879
蓝田县灞源镇中心学校	陕西省西安市蓝田县灞源镇李家俭村	109.703	34.1801
蓝田县小寨镇余家沟小学	陕西省西安市蓝田县小寨镇余家沟村	109.306	34.0308
蓝田县蓝关街道新城小学	陕西省西安市蓝田县蓝关镇	109.317	34.1542
蓝田县孟村镇李华小学	陕西省西安市蓝田县孟村镇	109.22	34.1634
蓝田县小寨镇牛心峪小学	陕西省西安市蓝田县柳上路	109.255	34.0567
蓝田县普化镇普化初级中学	陕西省西安市蓝田县普化镇吴家巷	109.285	34.1296
蓝田县前卫镇中心学校	陕西省西安市蓝田县孟吴路前卫镇	109.227	34.1258
蓝田县蓝桥镇柳坪小学	陕西省西安市蓝田县蓝桥镇	109.464	34.0718
蓝田县前卫镇吴村庙初级中学	陕西省西安市蓝田县孟吴路与玉平路交叉口南100米	109.251	34.1022
蓝田县向阳学校	陕西省西安市蓝田县蓝关镇新城村二组蔚蓝港湾	109.331	34.1586
蓝田县华胥镇轩辕小学	陕西省西安市蓝田县华胥镇	109.189	34.2247
蓝田县华胥镇孟岩小学	陕西省西安市蓝田县华胥镇孟家岩村正东方向150米	109.196	34.2259
蓝田县普化镇马楼小学	陕西省西安市蓝田县普化镇普华镇	109.406	34.1369
蓝田县葛牌镇中心学校	陕西省西安市蓝田县蓝田县焦岱柳家湾柳上路	109.24	34.0635
蓝田县安村镇中心学校	陕西省西安市蓝田县344国道与环东路交叉口西北160米	109.291	34.1284
蓝田县普化镇水陆庵初级中学	陕西省西安市蓝田县普化镇杨斜村委会	109.398	34.1371
蓝田县焦岱镇初级中学	陕西省西安市蓝田县焦岱镇政府斜对面	109.246	34.0615
蓝田县前卫镇滕寨完全小学	陕西省西安市蓝田县前卫镇滕寨村委会	109.193	34.1492
蓝田县汤峪镇代寨小学	陕西省西安市蓝田县汤峪镇	109.218	34.0224
蓝田县洩湖镇宋庙小学	陕西省西安市蓝田县洩湖镇薛家河村委会	109.258	34.1986
蓝田县辋川镇西杆庙小学	陕西省西安市蓝田县辋川镇锡水洞村委会	109.405	34.0622
蓝田县安村镇新华小学	陕西省西安市蓝田县安村镇新华村四组	109.258	34.1498
蓝田县九间房镇公王初级中学	陕西省西安市蓝田县九间房镇	109.511	34.1863
蓝田县汤峪镇孙家坡完全小学	陕西省西安市蓝田县汤峪镇孙家坡村委会	109.18	34.0271
蓝田县华胥镇张家斜小学	陕西省西安市蓝田县华胥镇张斜村二组	109.287	34.1802
蓝田县辋川镇中心学校	陕西省西安市蓝田县辋川镇官上村委会	109.36	34.0541
蓝田县前卫镇巩村完全小学	陕西省西安市蓝田县前卫镇西巩村委会	109.23	34.1342
蓝田县小寨镇中心学校	陕西省西安市蓝田县小寨镇关庙村委会	109.271	34.0533
蓝田县灞源镇林青小学	陕西省西安市蓝田县九灞路附近	109.524	34.176
蓝田县前卫镇王庄完全小学	陕西省西安市蓝田县前卫镇王庄村委会	109.198	34.1284
蓝田县普化镇石头滩小学	陕西省西安市蓝田县普化镇石头滩村委会	109.42	34.1608
蓝田县三官庙镇金山小学	陕西省西安市蓝田县临蓝路	109.379	34.2753
蓝田县灞源镇麻村小学	陕西省西安市蓝田县灞源镇麻村二	109.746	34.1527
蓝田县汤峪镇张坡小学	陕西省西安市蓝田县汤峪镇张坡村	109.204	34.0481
蓝田县三里镇刘独庄小学	陕西省西安市蓝田县临蓝路三里镇	109.308	34.1701
蓝田县洩湖镇漫道小学	陕西省西安市蓝田县101省道	109.501	34.1877
蓝田县工业园区小学	陕西省西安市蓝田县迎宾路与温泉路交叉路口往西北约50米	109.305	34.168
西安市雁塔区双水磨小学	陕西省西安市雁塔区丈八北路137号	108.876	34.2157
西安市雁塔区木塔寨小学	陕西省西安市雁塔区太白南路永阳一巷216号	108.896	34.2021
八七七厂子校	陕西省西安市雁塔区电子城街道电子正街469号	108.92	34.2148
西安市浐灞第二十小学	陕西省西安市雁塔区咸宁东路田家湾村	109.04	34.2481
陕西省青少年体校	陕西省西安市雁塔区丈八东路303号	108.884	34.2053
西安市雁塔区第一中学	陕西省西安市雁塔区青龙寺路与新安路十字西南角	109.005	34.2355
西安高新区第四学校	陕西省西安市雁塔区高新区丈八北路40号	108.872	34.2494
西安同仁蒙正学校	陕西省西安市雁塔区长鸣路39号	109.034	34.2126
西安市雁塔区长安南路小学	陕西省西安市雁塔区长安南路497号	108.949	34.2115
西安市雁塔区航天二一〇小学	陕西省西安市雁塔区电子城街道电子二路31号	108.922	34.2125
西安市第五十三中学	陕西省西安市雁塔区鱼化寨街道日化社区	108.874	34.2439
西安市育才中学	陕西省西安市雁塔区兴善寺东街115号	108.949	34.2257
西安高新区实验小学	陕西省西安市雁塔区科技三路与科技四路之间	108.866	34.2183
西安市雁塔区第八小学	陕西省西安市雁塔区漳浒寨街道华洲城社区	108.847	34.2463
西安市雁塔区第二中学	陕西省西安市雁塔区电子正街与双桥头路十字东南角	108.92	34.1934
西安市第九十八中学	陕西省西安市雁塔区朱雀大街南端272号	108.94	34.2226
西安市雁塔区第一小学	陕西省西安市雁塔区新安路与二环路西南角	108.906	34.2406
西安电子科技大学附属中学	陕西省西安市雁塔区科技路39号	108.901	34.2336
西安科技大学附属中学	陕西省西安市雁塔区雁塔路南段98号	108.964	34.2244
西安电子科技大学附属小学	陕西省西安市雁塔区光华路28号	108.915	34.2304
西安市雁塔区明德小学	陕西省西安市雁塔区明德二路36号	108.934	34.2059
西安博迪恒大城小学	陕西省西安市雁塔区大寨路西段恒大城小区内	108.867	34.2469
西安市航天中学	陕西省西安市雁塔区航天南路180号	108.974	34.1435
西安市高新逸翠园初级中学	陕西省西安市雁塔区唐延南路与锦业三路交汇处东北角	108.882	34.1798
西安第二外国语学校	陕西省西安市雁塔区丈八北路1号	108.875	34.2029
西安市曲江第三小学	陕西省西安市雁塔区曲江池东路2666号	108.988	34.2008
西安崇是中学	陕西省西安市雁塔区长安南路世家星城小区内	108.932	34.1925
西安藤信学校	陕西省西安市雁塔区西沣三路中段	108.894	34.1787
西安雁塔铭城小学	陕西省西安市雁塔区丈八北路与大寨路十字西南角铭城国际社区内	108.856	34.2468
西安高新第二小学	陕西省西安市雁塔区沣惠南路6号	108.887	34.2333
西安市曲江南湖小学	陕西省西安市雁塔区曲江池西路与曲江池南路十字西南角	108.979	34.1931
西安电子科技中学	陕西省西安市雁塔区白沙路4号	108.91	34.2254
西安市雁塔区职业高级中学	陕西省西安市雁塔区沈家桥一路与西沣三路交汇处东北角	108.898	34.1789
西安高新第三中学	陕西省西安市雁塔区高新区丈八五路39号	108.864	34.1997
西安市雁塔区第二小学	陕西省西安市雁塔区电子正街与双桥头路十字东南角	108.92	34.1934
西安新希望职业高中	陕西省西安市雁塔区白沙路南段2号	108.907	34.2208
西安市雁塔区大雁塔小学雁南分校	陕西省西安市雁塔区翠华路390号	108.957	34.2278
西安雁南中学	陕西省西安市雁塔区东泰巷502号	108.932	34.1932
西安市浐灞丝路学校	陕西省西安市灞桥区世博大道与灞河东路交叉口	109.017	34.3974
西安曲江康桥学校	陕西省西安市雁塔区曲江新区雁翔路2288号	109.01	34.2015
西安市雁塔区翠华路小学	陕西省西安市雁塔区翠华路371号	108.957	34.227
西安交通大学附属中学航天高级中学	陕西省西安市长安区航天南路180号	108.974	34.1435
西安市曲江第三中学	陕西省西安市雁塔区公田五路与春临四路交汇处	108.997	34.1813
长安大学附属中学	陕西省西安市雁塔区长安南路497号	108.949	34.2115
陕西省石油化工学校	陕西省西安市雁塔区长安南路503号	108.952	34.2099
西安高新区第十二小学	陕西省西安市雁塔区化龙二路与科技六路交汇处	108.854	34.2116
西安市曲江第八小学	陕西省西安市雁塔区春临二路与公田五路交汇处	108.996	34.1867
西安高新东区小学	陕西省西安市雁塔区木塔寨东路109号	108.897	34.2037
西安雁塔融侨小学	陕西省西安市雁塔区电子西街2号	108.91	34.2021
西安航天菁英学校	陕西省西安市长安区航天城神舟二路211号	108.961	34.1682
西安市曲江第四小学	陕西省西安市雁塔区春临四路与公田三路交汇处	108.988	34.1785
西安东仪中学	陕西省西安市雁塔区电子正街69号	108.921	34.2
西安交通大学附属小学雁塔校区	陕西省西安市雁塔区雁塔西路143号	108.95	34.2185
西安市雁塔区吉祥路小学	陕西省西安市雁塔区吉祥路21号	108.93	34.2231
西安高新第七小学	陕西省西安市雁塔区丈八五路1号	108.863	34.2031
西安市第八十五中学	陕西省西安市雁塔区翠华路254号	108.956	34.2207
西安雁塔区艺林小学	陕西省西安市雁塔区雁环中路中铁尚都城旁	108.916	34.186
陕西省商贸学校	陕西省西安市雁塔区永松路125号	108.927	34.2294
西安市曲江第一小学	陕西省西安市雁塔区曲江路396号	108.985	34.2174
西安市第七十八中学	陕西省西安市雁塔区幸福南路6号	109.016	34.2373
西安市曲江第十小学	陕西省西安市雁塔区曲江路396号	108.985	34.2174
陕西省建筑材料工业学校	陕西省西安市雁塔区长安南路950号	108.94	34.1822
西安高新区第四完全中学	陕西省西安市雁塔区科技六路与瞪羚路十字西南角	108.866	34.2019
西安生物医药技术职业学校	陕西省西安市雁塔区鱼化工业园北岳路1号	108.827	34.2428
西安市曲江第十三小学	陕西省西安市雁塔区春临二路与公田五路交汇处	108.996	34.1867
西安市雁塔区第九小学	陕西省西安市雁塔区科技西路555号	108.816	34.236
西安市曲江第十六小学	陕西省西安市雁塔区春临五路与公田六路交汇处	108.988	34.1785
西安高新第四小学	陕西省西安市雁塔区科技三路与高新六路交汇处	108.877	34.2227
西安市曲江第一学校	陕西省西安市雁塔区雁翔路与南三环交界处	108.905	34.1873
西安市雁塔区第三小学	陕西省西安市雁塔区电子正街与双桥头路十字东南角	108.92	34.1934
西安市雁塔区西影路小学	陕西省西安市雁塔区西影路568号	108.969	34.2228
西安市雁塔区第十小学	陕西省西安市雁塔区电子城街道办事处北沈家桥路	108.897	34.1952
西安市雁塔区科创路小学	陕西省西安市雁塔区科创路162号	108.91	34.2242
西安高新区第三初级中学	陕西省西安市雁塔区丈八五路39号	108.864	34.1997
西安高新第五小学	陕西省西安市雁塔区丈八四路11号	108.87	34.1973
国营第一钟表机械厂子弟学校	陕西省西安市雁塔区翠华南路229号	108.957	34.2202
西安市曲江第六小学	陕西省西安市雁塔区公田二路与春临一路交汇处	109	34.1898
西安市高新第一学校	陕西省西安市雁塔区高新六路58号	108.876	34.2164
西安市第十四中学	陕西省西安市雁塔区丈八北路156号	108.872	34.2165
西安交通大学附属中学雁塔校区	陕西省西安市雁塔区雁塔西路143号	108.95	34.2185
西安兴华小学	陕西省西安市雁塔区电子正街69号	108.921	34.2
西安市曲江第一中学	陕西省西安市雁塔区曲江路396号	108.985	34.2174
西安浐灞绿地小学	陕西省西安市雁塔区雁翔路与南三环交界处	108.905	34.1873
西安市曲江第五小学	陕西省西安市雁塔区春临四路与公田三路交汇处	108.988	34.1785
西安高新区第十五小学	陕西省西安市雁塔区化龙二路与科技六路交汇处	108.854	34.2116
西安市雁塔区第六小学	陕西省西安市雁塔区大寨路与昆明池路交叉口西南440米	108.868	34.2463
西安市曲江第二小学	陕西省西安市雁塔区雁翔路与南三环交界处	108.905	34.1873
西安市高新一中初级中学	陕西省西安市雁塔区高新路62号	108.9	34.2275
西安高新区第十四小学	陕西省西安市雁塔区化龙二路与科技六路交汇处	108.854	34.2116
西安市雁塔区付村小学	陕西省西安市长安区丈八五路67号	108.862	34.1891
西安市雁塔区高新路小学	陕西省西安市雁塔区高新路25号	108.908	34.2354
西安高新区第十七小学	陕西省西安市雁塔区化龙三路与科技六路交汇处	108.85	34.2116
长安大学附属小学	陕西省西安市雁塔区长安南路497号	108.949	34.2115
西安市曲江第十二小学	陕西省西安市雁塔区春临三路与公田四路交汇处	108.991	34.1839
西安市雁塔区第三中学	陕西省西安市雁塔区丈八北路民新路口过街天桥旁	108.872	34.2488
西安市第四十五中学	陕西省西安市雁塔区翠花南路27号	108.957	34.2079
西安市曲江第七小学	陕西省西安市雁塔区春临五路与公田六路交汇处	108.988	34.1785
西安高新钱学森第二小学	陕西省西安市雁塔区科技二路与沣惠南路交汇处	108.888	34.2257
西安高新第二学校	陕西省西安市雁塔区沣惠南路6号	108.887	34.2333
西安市雁塔区杜城小学	陕西省西安市雁塔区杜城街道雁环中路88号	108.908	34.1825
西安市雁塔区第一学校	陕西省西安市雁塔区电子正街与双桥头路十字东南角	108.92	34.1934
西安高新区第十初级中学	陕西省西安市雁塔区经十二路科技六路	108.879	34.2116
西安特立实验小学	陕西省西安市雁塔区公园南路南段世家星城小区内	108.932	34.1925
西安高新第六小学	陕西省西安市长安区博士路与艺术大街十字东北角	108.868	34.1775
西安高新区第二十八小学	陕西省西安市雁塔区唐兴路	108.882	34.2326
西安曲江德闳学校	陕西省西安市雁塔区五典坡南路111号	109.011	34.1814
西安市雁塔区电子城小学	陕西省西安市雁塔区电子正街52号	108.919	34.2033
西安高新第三小学	陕西省西安市雁塔区科技四路3号	108.898	34.2171
西安高新第一中学	陕西省西安市高新区唐延路23号	108.891	34.2233
西安高新区第十三小学	陕西省西安市高新区科技六路与化龙二路十字西南角	108.89	34.233
西安高新区第十小学	陕西省西安市高新区科技六路与化龙三路十字西南角	108.89	34.233
西安市浐灞第二十七小学	陕西省西安市雁塔区等驾坡办事处白杨寨村	109.039	34.2376
西安市曲江第十五小学	陕西省西安市雁塔区长延堡街道办事处东三爻村	108.951	34.1847
西安高新第一小学	陕西省西安市雁塔区科技三路	108.888	34.2227
西安市雁塔区甘家寨小学	陕西省西安市雁塔区科技二路甘家寨	108.903	34.219
雁塔世纪城小学	陕西省西安市雁塔区长安南路82号	108.943	34.1907
西安市曲江第十四小学	陕西省西安市曲江新区公田五路与春临四路十字西南角	108.997	34.1813
西安博迪学校	陕西省西安市雁塔区鱼化寨富裕路1号	108.851	34.2313
西安高新区第十九小学	陕西省西安市高新区科技六路与化龙二路十字西南角	108.89	34.233
西安市雁塔区吉祥路小学延兴门分校	陕西省西安市雁塔区延兴门西路与建工路十字东北角	108.847	34.1957
西安市第四十六中学	陕西省西安市雁塔区东仪路202号	108.928	34.2092
西安市雁塔区丈八沟小学	陕西省西安市雁塔区丈八沟乡丈八沟村	108.88	34.1961
西安高新区第二十小学	陕西省西安市高新区科技六路与鱼化一路十字西南角	108.89	34.233
西安市雁塔区大雁塔小学西沣分校	陕西省西安市雁塔区西沣路与西部大道十字西南角	108.907	34.2115
陕西师范大学附属小学	陕西省西安市雁塔区翠华路115号	108.96	34.2156
西安高新区第十六小学	陕西省西安市高新区科技六路与化龙二路十字西南角	108.89	34.233
西安市雁塔区第五小学	陕西省西安市雁塔区双桥二巷第五小学	108.915	34.1934
西安市雁塔区辛庄小学	陕西省西安市雁塔区高新区丈八街道高新六路旁	108.877	34.2275
西安市曲江第九小学	陕西省西安市雁塔区曲江池东村雁引路9号	109.016	34.1765
西安市雁塔区西姜村小学	陕西省西安市雁塔区电子正街82号	108.919	34.2072
西安市雁塔区第七小学	陕西省西安市雁塔区茅坡路(雁南朗境南20米)	108.89	34.1673
西安市雁塔区东仪路小学	陕西省西安市雁塔区东仪路202号	108.928	34.2092
西安美术学院附属中等美术学校	陕西省西安市雁塔区含光南路100号	108.931	34.2186
西安市阳光中学	陕西省西安市雁塔区西影路5号	109.011	34.2391
西安太白学校	陕西省西安市雁塔区吉祥路354号	108.919	34.2243
西安高新区第四初级中学	陕西省西安市高新区科技六路与瞪羚路十字西南角	108.866	34.2019
西安博雅艺术职业高中有限公司	陕西省西安市雁塔区长安南路199号	108.951	34.204
西京公司子校	陕西省西安市雁塔区电子城街道电子三路1号	108.919	34.2084
西安音乐学院附属中等音乐学校	陕西省西安市雁塔区长安中路108号	108.944	34.2289
西安高新区第十八小学	陕西省西安市高新区科技六路与化龙三路十字西南角	108.89	34.233
西安南苑中学	陕西省西安市雁塔区丈八东路61号	108.918	34.1997
西安市雁塔区燎原小学	陕西省西安市雁塔区电子城街道科技路23号	108.919	34.2037
西安市雁塔区大雁塔小学	陕西省西安市雁塔区雁塔路4号	108.956	34.2179
西安市雁塔区大雁塔小学石桥华洲城分校	陕西省西安市雁塔区大寨路与石桥路交汇处华洲城小区内	108.848	34.2454
西安雁塔阳光小学	陕西省西安市雁塔区西影路5号	109.011	34.2391
西安市雁塔区第四小学	陕西省西安市雁塔区丈八北路与大寨路十字东北角200米	108.872	34.245
西安市雁塔区南窑头小学	陕西省西安市雁塔区科技二路南窑头社区内	108.882	34.2183
西安东方职业高级中学	陕西省西安市雁塔区新开门南路1088号	108.994	34.2018
西安市曲江第二中学	陕西省西安市曲江新区公田二路与春临一路交汇处	109	34.1898
西安雁塔金泰假日花城小学	陕西省西安市雁塔区丈八东路6号	108.941	34.1975
西安市第五十二中学	陕西省西安市雁塔区鱼化寨街道办事处日化社区	108.874	34.2439
陕西师范大学附属中学	陕西省西安市雁塔区翠华路南115号	108.96	34.2156
西安市雁塔区实验小学	陕西省西安市雁塔区长安南路世家星城小区内	108.932	34.1925
西安市雁塔区航天小学	陕西省西安市雁塔区航天大道366号	108.977	34.1671
西安市雁塔区红星小学	陕西省西安市雁塔区西影路5号	109.011	34.2391
西安市雁塔区明德门小学	陕西省西安市雁塔区明德二路36号	108.934	34.2059
西安市雁塔区昆明路小学	陕西省西安市雁塔区昆明路366号	108.851	34.252
西安市城南中学	陕西省西安市雁塔区长安南路497号	108.949	34.2115
西安高新东区初级中学	陕西省西安市雁塔区创汇社区F区	108.831	34.1806
西安高新唐南中学	陕西省西安市雁塔区高新路62号	108.9	34.2275
西安市曲江第十一小学	陕西省西安市雁塔区春临二路与公田五路交汇处	108.996	34.1867
西安市第九十九中学	陕西省西安市雁塔区长安南路6号	108.944	34.1806
雁塔雁南小学	陕西省西安市雁塔区长安南路82号	108.943	34.1907
西安市雁塔区等驾坡小学	陕西省西安市雁塔区等驾坡街道办事处等驾坡社区	108.927	34.2306
陕西钢厂子弟中学	陕西省西安市雁塔区建工路12号	109.011	34.2424
西安市雁塔区雁翔路小学	陕西省西安市雁塔区雁翔路与南三环交界处	108.905	34.1873
西安市雁塔区第二学校	陕西省西安市雁塔区电子正街与双桥头路十字东南角	108.92	34.1934
西安市航空六一八中学	陕西省西安市雁塔区电子一路239号	108.923	34.215
西安市第二十三中学	陕西省西安市莲湖区药王洞路3号	108.942	34.2735
西安市机电职业技术学校	陕西省西安市莲湖区西关正街南小巷16号	108.916	34.2538
西安陕文投睿德职业高级中学	陕西省西安市莲湖区汉城南路与红光路十字向西500米路南	108.947	34.271
西安市莲湖第一学校	陕西省西安市莲湖区汉城南路39号	108.872	34.2547
西安市莲湖区星火路小学	陕西省西安市莲湖区星火东巷1号	108.926	34.2827
西安市第一中学	陕西省西安市莲湖区环城西路铁塔寺3号	108.919	34.2645
西安市庆安初级中学	陕西省西安市莲湖区丰镐一巷4号	108.886	34.2608
西安市回民中学	陕西省西安市莲湖区北院门107号	108.945	34.2628
西安市第四十四中学	陕西省西安市莲湖区青年路189号	108.935	34.2722
西安市远东第一中学	陕西省西安市莲湖区团结四路20号附近	108.877	34.2644
西安市远东第二中学	陕西省西安市莲湖区枣园丰隆路	108.863	34.2711
西安市第十中学	陕西省西安市莲湖区振华路95号	108.942	34.2846
西安市莲湖区大庆路小学	陕西省西安市莲湖区大庆路198号	108.916	34.269
西安市第七十中学	陕西省西安市莲湖区西门里骆驼巷1号	108.928	34.2584
西安市莲湖区沣惠路小学	陕西省西安市莲湖区西二环北段152号	108.891	34.2853
西安市莲湖区丰庆路小学	陕西省西安市莲湖区丰庆路52号东段	108.921	34.2504
西安市莲湖区希望小学	陕西省西安市莲湖区永福路42号	108.936	34.2902
西安第四联合职业中学	陕西省西安市碑林区红缨东纺29号	108.941	34.2567
西安市莲湖区工农路小学	陕西省西安市莲湖区红庙坡工农路	108.933	34.2821
西安市莲湖区报恩寺街小学	陕西省西安市莲湖区报恩寺街道23号	108.943	34.2868
西安市莲湖区龙首村小学	陕西省西安市莲湖区龙首南路东区1-1-9号	108.952	34.2897
西安实验职业中等专业学校	陕西省西安市莲湖区早慈巷24号	108.931	34.2621
西安市莲湖区二府街小学	陕西省西安市莲湖区二府街20号	108.945	34.2669
西安市莲湖区枣园小学	陕西省西安市莲湖区金曹路	108.867	34.271
西安市第三十一中学	陕西省西安市莲湖区人民西巷2号	108.92	34.2551
西安市莲湖区郝家巷小学	陕西省西安市莲湖区自强西路23号	108.946	34.2803
西安市莲湖区八一街小学	陕西省西安市莲湖区糖坊街83号	108.943	34.2737
西安市莲湖区环城西路小学	陕西省西安市莲湖区铁塔寺路52号	108.918	34.2634
西安市莲湖第一初级中学	陕西省西安市莲湖区汉城南路39号	108.872	34.2547
西安市莲湖区红光路小学	陕西省西安市莲湖区红光路	108.857	34.2593
西安市莲湖区莲湖路小学	陕西省西安市莲湖区莲湖路01号	108.942	34.2701
西安市莲湖区远东第二小学	陕西省西安市莲湖区枣园西路38号	108.87	34.275
西安市莲湖区洒金桥小学	陕西省西安市莲湖区洒金桥街130号	108.933	34.2663
西安市莲湖区庆安小学	陕西省西安市莲湖区土门团结一路5号	108.887	34.2616
西安市莲湖区青年路小学	陕西省西安市莲湖区青年路75号	108.943	34.2712
西安外国语学校	陕西省西安市未央区凤城一路1号	108.952	34.3139
西安市莲湖区行知小学	陕西省西安市莲湖区桃园路街道丰登北路45号	108.896	34.2612
西安市莲湖区西桃园小学	陕西省西安市莲湖区汇鑫花园对面	108.896	34.2426
陕西省西安小学	陕西省西安市莲湖区莲湖路91号	108.938	34.2704
西安市第二十五中学	陕西省西安市莲湖区庙后街99号	108.938	34.2645
西安市莲湖区第二实验小学	陕西省西安市莲湖区西大街梁家牌楼9号路北	108.934	34.2582
西安莲湖锦园小学	陕西省西安市莲湖区桃园南路29号	108.902	34.2537
西安市莲湖区土门小学	陕西省西安市莲湖区西二环南路56号	108.944	34.2653
西安市莲湖区机场小学	陕西省西安市莲湖区丰镐东路190号	108.9	34.2587
西安市莲湖区西关第一小学	陕西省西安市莲湖区西关正街83号	108.921	34.2597
西安市西电中学	陕西省西安市莲湖区桃园西路16号	108.9	34.2666
西安市莲湖区西电实验小学	陕西省西安市莲湖区劳动西路8号	108.908	34.2666
西安市庆安高级中学	陕西省西安市莲湖区丰镐一巷3号	108.887	34.2614
西安市莲湖区前卫路小学	陕西省西安市莲湖区药王路228号	108.944	34.2653
西安市莲湖区西铁小学	陕西省西安市莲湖区星火路63号	108.923	34.2842
西安市第六十七中学	陕西省西安市莲湖区明珠巷5号E附近	108.926	34.2827
西安市莲湖区劳动路小学	陕西省西安市莲湖区西仪坊26号	108.913	34.2672
西安莲湖德杰实验小学	陕西省西安市莲湖区汉城西路与德杰路交叉口西南140米	108.861	34.2592
西安市益新中学	陕西省西安市莲湖区环城西路铁塔寺19号	108.916	34.2652
西安市莲湖区大兴新区小学	陕西省西安市莲湖区梨园路22号	108.901	34.2924
西安市莲湖区陕西师范大学实验小学	陕西省西安市莲湖区工农路156号	108.933	34.2834
西安市第四十二中学	陕西省西安市莲湖区西关正街379号	108.914	34.2596
西安市莲湖区贡院门小学	陕西省西安市莲湖区桥梓口地铁站A口	108.93	34.2597
西安市莲湖区庙后街小学	陕西省西安市莲湖区庙后街65号	108.937	34.2633
西安市莲湖区大兴实验小学	陕西省西安市莲湖区丰禾路与丰禾一路交叉口西北100米	108.907	34.2817
西安市莲湖区二府庄小学	陕西省西安市莲湖区二府庄31号	108.944	34.2653
西安市莲湖第二学校	陕西省西安市莲湖区枣园北路与立信路交叉口东北120米	108.857	34.285
西安市莲湖区远东实验小学	陕西省西安市莲湖区立信路999号	108.863	34.2856
西安市莲湖区远东第一小学	陕西省西安市莲湖区团结南路3号	108.882	34.261
西安外国语学校第二小学部	陕西省西安市莲湖区红庙坡兴中路8号	108.935	34.2844
西安市大兴新区初级中学	陕西省西安市莲湖区博望路	108.944	34.2653
西安市莲湖区邓家村小学	陕西省西安市莲湖区大兴西路102号	108.874	34.2862
西安市莲湖区金光门小学	陕西省西安市莲湖区西二环99号	108.944	34.2653
西安市莲湖区南小巷小学	陕西省西安市莲湖区西关正街南小巷52号	108.917	34.2566
西安市大兴中学	陕西省西安市莲湖区桃园路街道	108.906	34.2667
西安工业经济职业学校	陕西省西安市未央区草滩十路758号	108.854	34.3642
西安市汇知中学	陕西省西安市新城区后宰门97号	108.952	34.2717
西安市第七十二中学	陕西省西安市新城区长缨西路50号	108.993	34.2772
西安市西光中学	陕西省西安市新城区康乐路116号	109.01	34.2671
西安市第八十三中学	陕西省西安市新城区咸宁中路151号	109.007	34.2514
西安行知中学	陕西省西安市新城区爱学路中段	109.005	34.2535
西安市新城区黄河小学	陕西省西安市新城区公园北路45号	109.007	34.2673
西安市新城区后宰门小学幸福校区	陕西省西安市新城区黄家坡社区福泽苑南	109.027	34.2578
西安市新城区后宰门小学	陕西省西安市新城区后宰门29号	108.955	34.2721
西安市第三十中学	陕西省西安市新城区西新街51-10号	108.949	34.2652
西安市华山中学	陕西省西安市新城区康乐路88号	109.01	34.2636
西安市新城区华山实验小学	陕西省西安市新城区康乐路90号	109.01	34.2646
西安市新城区建筑小学	陕西省西安市新城区四合窑34号	108.99	34.2758
西安市第八十九中学教育集团弘德中学	陕西省西安市新城区自强东路653号	108.953	34.2815
西安市新城区后宰门小学教育集团励志小学	陕西省西安市新城区长乐西路街道长缨西路450号	108.978	34.2767
西安市黄河中学	陕西省西安市新城区长乐中路街道金康路8号	109.007	34.2679
西安市新城区秦川小学	陕西省西安市新城区爱民路韩森寨二十八街坊	109.008	34.254
西安市新城区东方小学咸宁分校	陕西省西安市新城区咸宁东路与知行巷交叉口西160米	109.029	34.2478
西安市第八十九中学分校	陕西省西安市新城区太华南路纱厂东街145号	108.976	34.2813
陕西省西安爱知中学	陕西省西安市新城区西七路239号	108.952	34.2737
西安市第八十九中学	陕西省西安市新城区后宰门143号	108.95	34.2723
西安市新城区昆仑小学	陕西省西安市新城区长乐中路55号	109.004	34.2708
西安市新城区励行小学	陕西省西安市新城区长缨西路364号	108.982	34.2766
西安市第八十九中学教育集团尚德中学	陕西省西安市新城区西一路与尚德路交叉口西100米	108.961	34.272
西安市新城区通济坊小学	陕西省西安市新城区北大街光辉巷52号	108.948	34.268
西安市新城区新知小学	陕西省西安市新城区西七路199号	108.953	34.2741
西安市新城区励耘小学	陕西省西安市新城区化育巷19号	108.97	34.2654
西安涉外职业高中	陕西省咸阳市渭城区秦汉新城兰池大道与秦阳一路交叉口东北角	108.918	34.4123
西安市新城区自达小学	陕西省西安市新城区金花北路31号	108.998	34.2747
西安育英小学	陕西省西安市新城区西七路189号	108.954	34.2738
西安黄河实验小学	陕西省西安市新城区幸福路北3号	109.016	34.2521
西安市新城区长缨路小学	陕西省西安市新城区东郊长缨西路76号	108.991	34.2773
西安市新城区明志小学	陕西省西安市新城区八府庄南路华清小区一区1号楼	108.987	34.2838
西安市大明宫中学	陕西省西安市新城区建强路5号	108.958	34.2914
西安电机厂子弟学校	陕西省西安市新城区金花北路25号附1号	108.997	34.2731
西安市东方中学	陕西省西安市新城区新科路59号	109.012	34.2485
西安市新城区西交康桥紫薇东进小学	陕西省西安市新城区含元北路紫薇东进	108.983	34.2938
西安市新城区东方小学	陕西省西安市新城区新科路21号	109.012	34.2471
西安市新城区向荣巷小学	陕西省西安市新城区联志路71号	108.951	34.2846
西安市实验小学麟德校区	陕西省西安市新城区自强路街道北稍门联志路5号	108.953	34.2842
西安市实验小学	陕西省西安市新城区尚德路125号	108.961	34.2678
西安市新城区太华路小学	陕西省西安市新城区太华南路189号	108.972	34.2831
西安市新城区后宰门小学明欣分校	陕西省西安市新城区西闸口19号	108.954	34.2791
西安新城华清小学	陕西省西安市新城区幸福南路85号	109.018	34.243
西安市新城区中兴路小学	陕西省西安市新城区永乐小区南50米	108.975	34.2678
西安市第三十八中学	陕西省西安市新城区太华南路226号	108.971	34.2837
西安市新城区西光实验小学	陕西省西安市新城区康乐路146号	109.009	34.2675
西安市昆仑中学	陕西省西安市新城区长乐中路49号	109.005	34.2708
西安市实验小学兴德校区	陕西省西安市新城区火炬路普天小区(公园南路地铁站B口步行470米)	109.006	34.2509
西安市秦川中学	陕西省西安市新城区咸宁东路398号	109.027	34.2475
西安市新城区坤中巷小学	陕西省西安市新城区尚俭路487号	108.966	34.2732
西安市新城区八府庄小学	陕西省西安市新城区太华路街道含元北路90号	108.981	34.2911
西安市第四十三中学	陕西省西安市新城区新城区东四路40号	108.969	34.2683
西安市浐灞第三十一小学	陕西省西安市灞桥区广运潭大道滨水花城东侧	109.017	34.305
西安市新城区黄河小学电力分校	陕西省西安市新城区金花北路280号	108.995	34.2736
陕西汽车集团有限责任公司第二职工子弟学校	陕西省西安市新城区兴工东路41号	109.009	34.2842
西安市新城区后宰门小学大明宫分校	陕西省西安市新城区二马路391号	108.959	34.2826
西安市新城区西一路小学	陕西省西安市新城区西一路215号	108.948	34.2619
西安市新城区昆仑小学张家庄分校	陕西省西安市新城区勤工路与长缨东路交叉口南100米	109.001	34.2749
西安市实验小学贤德校区	陕西省西安市新城区集贤巷2	108.954	34.2609
西安职业中等专业学校	陕西省西安市新城区尚勤路618号	108.966	34.2755
西安市汇文中学	陕西省西安市新城区长乐西路121号附近	108.985	34.2695
西安市鄠邑区第四中学	陕西省西安市鄠邑区秦渡镇北庞村	108.694	34.1026
西安市鄠邑区炉丹村小学	陕西省西安市鄠邑区庞光街道炉东村	108.662	34.0444
陕西科技卫生学校	陕西省西安市高新区秦渡镇	108.716	34.1082
西安市鄠邑区真守小学	陕西省西安市鄠邑区真守村	108.623	34.1841
西安市鄠邑区石井中心学校	陕西省西安市鄠邑区石井镇石中村	108.589	34.0419
西安市鄠邑区化羊小学	陕西省西安市鄠邑区庞光镇化羊村北	108.661	34.0299
西安市鄠邑区响桥小学	陕西省西安市鄠邑区祖庵镇响桥村委会	108.522	34.1066
西安市鄠邑区坳河小学	陕西省西安市鄠邑区渭丰镇坳河村南环路	108.607	34.1784
西安市鄠邑区余下中心学校	陕西省西安市鄠邑区余下镇	108.639	34.0617
西安市鄠邑区两营小学	陕西省西安市鄠邑区甘亭镇东马营村	108.631	34.0962
西安市鄠邑区甘亭中心学校	陕西省西安市鄠邑区甘亭中心学校	108.604	34.1048
西安市鄠邑区天桥初级中学	陕西省西安市鄠邑区玉蝉街道刘家庄村	108.741	34.024
西安市鄠邑区元村小学	陕西省西安市鄠邑区元三村	108.613	34.2163
西安市鄠邑区第八中学	陕西省西安市鄠邑区祖庵街道	108.498	34.1045
西安市鄠邑区新区第一学校	陕西省西安市鄠邑区兆丰东路37号	108.628	34.1012
西安市鄠邑区职教中心	陕西省西安市鄠邑区五竹镇	108.651	34.1109
陕西实验高级中学	陕西省西安市鄠邑区甘亭镇西坡村	108.587	34.1079
西安市鄠邑区北街小学	陕西省西安市鄠邑区北大街50号	108.604	34.1095
西安市鄠邑区南羊小学	陕西省西安市鄠邑区南羊村	108.618	34.1461
西安市鄠邑区蒋村初级中学	陕西省西安市鄠邑区蒋村街道108省道	108.709	34.0087
西安市鄠邑区元驾小学	陕西省西安市鄠邑区元驾村	108.548	34.1539
西安市鄠邑区山阴小学	陕西省西安市鄠邑区余下镇旧泉坊村	108.639	34.0617
西安市鄠邑区青羊寨小学	陕西省西安市鄠邑区甘亭镇青羊寨村	108.62	34.1202
西安滨河荣华实验小学	陕西省西安市鄠邑区涝滨南路3号	108.592	34.1058
西安市鄠邑区吕公小学	陕西省西安市鄠邑区甘亭镇吕公寨村吕公小学	108.614	34.0928
西安外国语大学鄠邑区实验小学	陕西省西安市鄠邑区丰二东路	108.658	34.1145
西安市鄠邑区太平学校	陕西省西安市鄠邑区太平乡太平镇	108.72	33.996
西安市鄠邑区新区小学	陕西省西安市鄠邑区许滨路	108.629	34.1155
西安市鄠邑区石井初级中学	陕西省西安市鄠邑区石井街道曹家堡村南	108.613	34.0362
户县大王镇中心学校	陕西省西安市鄠邑区大王西村西正街001号	108.641	34.2042
西安市鄠邑区玉蝉中心学校	陕西省西安市鄠邑区465村道北50米	108.605	34.1087
西安市鄠邑区善慧小学	陕西省西安市鄠邑区渭丰镇定舟村	108.625	34.2117
西安市鄠邑区河头小学	陕西省西安市鄠邑区古城西路	108.592	34.1238
西安市鄠邑区草下小学	陕西省西安市鄠邑区陕西省西安市鄠邑区	108.605	34.1087
西安市鄠邑区西街小学	陕西省西安市鄠邑区甘亭镇西大街23号	108.602	34.1086
西安市鄠邑区渭丰中心学校	陕西省西安市鄠邑区大张路南150米	108.605	34.1087
西安市鄠邑区联东小学	陕西省西安市鄠邑区玉蝉镇联东南村村委会	108.588	34.0784
西安市鄠邑区秦英小学	陕西省西安市鄠邑区秦渡街道秦镇开发区长安大街88号	108.749	34.1086
西安惠安中学	陕西省西安市鄠邑区余下街道兴教路104号	108.623	34.0607
西安市鄠邑区甘河初级中学	陕西省西安市鄠邑区甘河镇甘河村	108.521	34.1574
西安市鄠邑区五竹中心学校	陕西省西安市鄠邑区五竹街道东五竹村	108.661	34.1248
西安医药科技职业学校	陕西省西安市鄠邑区西户高新技术产业开发区大学南路3号	108.65	34.095
西安市鄠邑区振华学校	陕西省西安市鄠邑区五竹镇振华威村委会	108.651	34.1109
西安市鄠邑区罗什小学	陕西省西安市鄠邑区余下镇罗什村西	108.602	34.0704
西安市鄠邑区第一中学	陕西省西安市鄠邑区画展街16号	108.61	34.1116
西安市鄠邑区庞光中心学校	陕西省西安市鄠邑区庞光镇王寨村	108.679	34.0392
西安市鄠邑区涝店初级中学	陕西省西安市鄠邑区涝店街道涝下村	108.559	34.1713
西安市鄠邑区东关小学	陕西省西安市鄠邑区画展街11号	108.61	34.1119
西安市鄠邑区玉立实验小学	陕西省西安市鄠邑区沣京大道锦玉路232号	108.67	34.1072
西安市鄠邑区水磨头小学	陕西省西安市鄠邑区玉蝉镇水磨头村委会	108.547	34.0441
西安市鄠邑区军民小学	陕西省西安市鄠邑区甘亭镇洪洞庵村	108.59	34.1404
西安市鄠邑区蒋村中心学校	陕西省西安市鄠邑区蒋村街道108省道	108.709	34.0087
西安市鄠邑区电厂中学	陕西省西安市鄠邑区团结西路162号	108.623	34.0645
西安市鄠邑区张家小学	陕西省西安市鄠邑区涝店街道张家村	108.531	34.1964
西安市鄠邑区孙姑小学	陕西省西安市鄠邑区庞光镇孙姑村	108.691	34.0567
西安市鄠邑区渭丰初级中学	陕西省西安市鄠邑区渭丰街道渭北村	108.604	34.2047
西安市鄠邑区丈八寺小学	陕西省西安市鄠邑区玉蝉镇丈南村	108.543	34.0782
西安市鄠邑区运渠店小学	陕西省西安市鄠邑区甘河镇运渠店村委会	108.495	34.1503
西安惠安小学	陕西省西安市鄠邑区余下街道中心南街150号	108.627	34.059
西安市鄠邑区青阳小学	陕西省西安市鄠邑区蒋村街道马村	108.515	34.0703
沣西新城爱华小学	陕西省西咸新区沣西新城大王镇梧村	108.663	34.1985
户县大王东小学	陕西省西安市鄠邑区大王街道646村道	108.654	34.204
西安市鄠邑区玉蝉初级中学	陕西省西安市鄠邑区玉蝉镇水亭村	108.57	34.1044
西安市鄠邑区庞光初级中学	陕西省西安市鄠邑区庞光街道庞新街	108.672	34.0361
西安市鄠邑区第六中学	陕西省西安市鄠邑区甘亭镇215县道娄村	108.614	34.1363
西安市鄠邑区青羊务小学	陕西省西安市鄠邑区五竹镇沣京工业园社区	108.657	34.1127
西安市鄠邑区祖庵中心学校	陕西省西安市鄠邑区祖庵镇南街村	108.52	34.0918
户县卓日村小学	陕西省西安市鄠邑区大王镇卓日村	108.645	34.1995
西安市鄠邑区天桥小学	陕西省西安市鄠邑区玉蝉镇龙家寨村	108.559	34.0524
西安高新区第五学校	陕西省西安市鄠邑区秦岭四路草堂八路与草堂九路间	108.724	34.0239
西安市鄠邑区北斑小学	陕西省西安市鄠邑区玉蝉镇斑竹园村委会	108.588	34.0784
西安市鄠邑区东关初级中学	陕西省西安市鄠邑区沣京大道与东城路十字东南角	108.635	34.105
西安市鄠邑区郭村小学	陕西省西安市鄠邑区甘亭街道办郭村村委会	108.602	34.1078
西安市鄠邑区草堂营小学	陕西省西安市鄠邑区草堂镇草堂营村	108.749	34.0086
西安市鄠邑区户电路小学	陕西省西安市鄠邑区甘亭街道办瑶头村村委会	108.602	34.1078
西安市鄠邑区阳光小学	陕西省西安市鄠邑区秦渡镇崔家湾村	108.704	34.0939
西安市鄠邑区白庙初级中学	陕西省西安市鄠邑区蒋村镇城傅村北	108.509	34.058
西安市鄠邑区第二中学	陕西省西安市鄠邑区甘河街道甘河村	108.521	34.1574
西安市鄠邑区涝店中心学校	陕西省西安市鄠邑区涝店街道涝店村	108.559	34.1686
西安高新区第三十小学	陕西省西安市鄠邑区区泰和社区	108.726	34.0408
西安市鄠邑区甘河中心学校	陕西省西安市鄠邑区甘河镇甘曹路	108.52	34.1055
西安市鄠邑区电厂小学	陕西省西安市鄠邑区团结西路93号	108.624	34.0647
西安市鄠邑区光明小学	陕西省西安市鄠邑区甘亭街道办事处西韩村	108.605	34.1256
西安市鄠邑区白庙小学	陕西省西安市鄠邑区蒋村镇白庙村委会	108.514	34.0633
西安市鄠邑区草堂中心学校	陕西省西安市鄠邑区草堂镇宋西村	108.72	34.0473
西安市鄠邑区人民路小学	陕西省西安市鄠邑区东新路西段北侧1号	108.625	34.1041
西安市鄠邑区史家庄小学	陕西省西安市鄠邑区涝店镇史家庄村委会	108.544	34.177
西安市鄠邑区牛东小学	陕西省西安市鄠邑区秦渡镇牛四村	108.704	34.1103
西安市鄠邑区宏桥小学	陕西省西安市鄠邑区秦渡镇工贸园区	108.716	34.1082
西安市鄠邑区花园小学	陕西省西安市鄠邑区秦渡镇东花园村委会	108.73	34.1187
西安市鄠邑区五竹初级中学	陕西省西安市鄠邑区五竹镇周贵坊村委会	108.661	34.1037
西安市鄠邑区余姚小学	陕西省西安市鄠邑区涝店街道余姚村	108.575	34.1878
西安市鄠邑区兆丰桥小学	陕西省西安市鄠邑区潭滨南路	108.646	34.1012
西安市鄠邑区北关初级中学	陕西省西安市鄠邑区甘亭街道文明东路5号	108.602	34.1078
户县大王初级中学	陕西省西安市鄠邑区大王镇	108.645	34.1995
西安市鄠邑区渭兴初级中学	陕西省西安市鄠邑区渭丰镇坳河村委会	108.601	34.1831
西安市鄠邑区南关初级中学	陕西省西安市鄠邑区南环路中段11号	108.607	34.1784
西安市鄠邑区韩村小学	陕西省西安市鄠邑区蒋村街道韩村	108.494	34.1076
西安市鄠邑区父慈小学	陕西省西安市鄠邑区秦渡镇父慈村	108.717	34.0716
西安市鄠邑区三泉小学	陕西省西安市鄠邑区石井镇蔡家坡村委会	108.641	34.0185
西安市鄠邑区柿园小学	陕西省西安市鄠邑区石井镇柿园村	108.618	34.0339
西安市鄠邑区崔村小学	陕西省西安市鄠邑区甘亭街道办崔村村委会	108.616	34.1642
西安市临潼区华清中学	陕西省西安市临潼区书院东街6号	109.222	34.3651
西安市临潼区秦汉学校	陕西省西安市临潼区小寨二路北侧	109.192	34.3815
西安市临潼区油槐街道办事处油街小学	陕西省西安市临潼区油槐街道办事处油街村	109.399	34.5592
西安市临潼区骊山街道办事处骊山小学	陕西省西安市临潼区骊山街道办下北街甲1号	109.216	34.3723
西安市临潼区西泉街道办事处三王小学	陕西省西安市临潼区西泉街道办事处兴王村	109.126	34.383
西安市临潼区新丰街道办事处皂安小学	陕西省西安市临潼区新丰街道办事处皂安村	109.308	34.4702
西安市临潼区陕鼓中学	陕西省西安市临潼区代王街道陕鼓社区一区	109.301	34.395
西安市临潼区秦陵街道办事处下和小学	陕西省西安市临潼区秦陵街道办事处下和村	109.269	34.3863
西安市临潼区栎阳初级中学	陕西省西安市临潼区栎阳街道东新街	109.213	34.583
西安市临潼区斜口街道办事处窑村小学	陕西省西安市临潼区斜口街道办事处窑村	109.127	34.3541
西安市临潼区斜口街道办事处韩峪小学	陕西省西安市临潼区平峪路41号	109.151	34.3266
西安市临潼区马额初级中学	陕西省西安市临潼区马额街道吴家村	109.38	34.4118
西安市临潼区斜口街道办事处柳树小学	陕西省西安市临潼区斜口街道办事处柳树村	109.143	34.3717
西安市临潼区火车站小学	陕西省西安市临潼区人民北路德杰十字南100米路东	109.213	34.3843
西安临潼博睿小学	陕西省西安市临潼区斜口街道办事处代张杨村	109.129	34.3499
西安市临潼区金骊小学	陕西省西安市临潼区黄金大道3号	109.185	34.3968
西安市临潼区何寨街道办事处孙家小学	陕西省西安市临潼区何寨街道办事处孙家村	109.345	34.5259
西安市临潼区雨金九年制学校	陕西省西安市临潼区雨金街道392号	109.249	34.5138
西安市临潼区铁路小学	陕西省西安市临潼区西关正街西铁社区2号	109.206	34.3712
西安市临潼区何寨街道办事处圣力寺小学	陕西省西安市临潼区何寨街道办事处圣力寺村	109.299	34.5186
西安市临潼区砖房小学	陕西省西安市临潼区秦陵古地新村秦陵路1号附1号	109.238	34.3848
西安康桥职业高中	陕西省西安市未央区未央湖开发区花园路8号	108.977	34.3923
西安市临潼区零口初级中学	陕西省西安市临潼区零口街道北段	109.362	34.4777
西安市临潼区西泉街道办事处东赵小学	陕西省西安市临潼区西泉街道办事处东赵村	109.13	34.3929
西安市临潼区实验小学	陕西省西安市临潼区桃源北路	109.225	34.3896
西安市临潼区穆寨中心小学	陕西省西安市临潼区穆寨街道业池村	109.373	34.3691
西安临潼华乐学校	陕西省西安市临潼区秦陵北路109号	109.27	34.3901
西安市临潼区马额中学	陕西省西安市临潼区马额街道东段	109.386	34.4023
西安市临潼区新市街道办事处新市小学	陕西省西安市临潼区新市街道办事处新市村	109.185	34.5367
西安市临潼区新丰街道办事处新丰小学	陕西省西安市临潼区鸿门路75号	109.275	34.4229
西安市临潼区临潼中学	陕西省西安市临潼区体育路8号	109.231	34.383
西安市临潼区北田街道办事处尖角小学	陕西省西安市临潼区北田街道办事处尖角村	109.193	34.4546
西安市临潼区徐杨街道办事处尚寨小学	陕西省西安市临潼区徐杨街道办事处尚寨村	109.175	34.6112
西安市临潼区何寨初级中学	陕西省西安市临潼区何寨街道中段	109.324	34.5151
西安市临潼区栎阳街道办事处义和小学	陕西省西安市临潼区栎阳街道办事处义和村	109.186	34.58
西安启航职业高级中学	陕西省西安市灞桥区沁水路26号	109.034	34.2527
西安市临潼区陕缝学校	陕西省西安市临潼区秦陵街道秦陵东侧	109.231	34.3801
西安市临潼区雨金中学	陕西省西安市临潼区雨金街道376号	109.249	34.5138
西安市临潼区职业教育中心	陕西省西安市临潼区西潼路61号	109.286	34.43
西安市临潼区代王街道办事处代王小学	陕西省西安市临潼区代王街道办事处代王村	109.303	34.396
西安市临潼区相桥街道办事处田市小学	陕西省西安市临潼区相桥街道办事处田市村	109.426	34.6177
西安市临潼区斜口街道办事处代张杨小学	陕西省西安市临潼区仁斜路g30号	109.13	34.3348
西安市临潼区土桥中心小学	陕西省西安市临潼区土桥街15号	109.214	34.3672
西安市临潼区康复路小学	陕西省西安市临潼区康复路19号	109.202	34.3631
西安市临潼区相桥街道办事处八里小学	陕西省西安市临潼区相桥街道办事处八里村	109.429	34.579
西安市临潼区西泉街道办事处桑园小学	陕西省西安市临潼区西泉街道办事处桑园村	109.143	34.4141
西安市临潼区马额街道办事处马额小学	陕西省西安市临潼区马额街道办事处马额村	109.392	34.4021
西安市临潼区秦陵初级中学	陕西省西安市临潼区秦陵街道毛家村	109.238	34.3891
西安市临潼区西泉街道办事处西泉小学	陕西省西安市临潼区西泉街道办事处西泉村	109.144	34.4063
西安市临潼区华清小学	陕西省西安市临潼区书院门街1号	109.214	34.3671
西安市临潼区相桥街道办事处相桥小学	陕西省西安市临潼区相桥街道办事处相桥村	109.372	34.612
西安市临潼区陕鼓小学	陕西省西安市临潼区代王街道陕鼓路18号	109.302	34.3906
西安市临潼区化工院中学	陕西省西安市临潼区北关社区一小巷1号	109.215	34.3855
西安市临潼区临潼小学	陕西省西安市临潼区文化东路79号	109.218	34.3785
西安市临潼区徐杨高级职业中学	陕西省西安市临潼区徐杨街道208号	109.146	34.6183
西安市临潼区铁炉初级中学	陕西省西安市临潼区铁炉街道西段	109.444	34.3929
西安市临潼区相桥初级中学	陕西省西安市临潼区相桥街道东关	109.253	34.5118
西安市临潼区何寨街道办事处何寨小学	陕西省西安市临潼区何寨街道办事处何寨村	109.324	34.5131
西安市临潼区新市街道办事处走马小学	陕西省西安市临潼区新市街道办事处走马村	109.191	34.512
西安市临潼区北田街道办事处北田小学	陕西省西安市临潼区北田街道办事处秦御佳苑社区居委会	109.183	34.4627
西安市临潼区零口街道办事处中牛小学	陕西省西安市临潼区零口街道办事处北牛村北10米	109.32	34.4727
西安市临潼区西泉街道办事处麦王小学	陕西省西安市临潼区西泉街道办事处麦王村	109.133	34.4096
西安市临潼区任留街道办事处韦家小学	陕西省西安市临潼区任留街道办事处韦家村	109.125	34.3686
西安市临潼区任留初级中学	陕西省西安市临潼区任留街道	109.209	34.4895
西安市临潼区秦陵街道办事处毛家小学	陕西省西安市临潼区秦陵街道办事处毛家村	109.238	34.3891
西安市临潼区油槐初级中学	陕西省西安市临潼区油槐街道中段	109.387	34.557
西安市临潼区任留街道办事处南屯小学	陕西省西安市临潼区任留街道东口村5组	109.253	34.4665
西安市临潼区西泉初级中学	陕西省西安市临潼区西泉街办贾村	109.142	34.3942
西安市临潼区零口街道办事处童家小学	陕西省西安市临潼区零口街道办事处范家村	109.339	34.4768
西安市临潼区骊山初级中学	陕西省西安市临潼区西关正街10号	109.207	34.37
西安市临潼区代王中学	陕西省西安市临潼区代王街道北侧	109.295	34.3965
西安市临潼区马额街道办事处吴家小学	陕西省西安市临潼区马额街道办事处吴家村	109.38	34.4118
西安市临潼区田家炳中学	陕西省西安市临潼区仁宗街道1号	109.323	34.3493
西安市临潼区西泉街道办事处椿树小学	陕西省西安市临潼区西泉街道办事处椿树村	109.109	34.3836
西安市临潼区北田街道办事处温梁小学	陕西省西安市临潼区北田街道办事处温梁村	109.195	34.4773
西安市临潼区铁路中学	陕西省西安市临潼区西关正街9号	109.207	34.3703
西安市临潼区仁宗中心小学	陕西省西安市临潼区仁宗街道芋坡村	109.294	34.3108
西安市临潼区徐杨初级中学	陕西省西安市临潼区徐杨街道南段	109.149	34.6124
西安市临潼区油槐街道办事处槐李小学	陕西省西安市临潼区油槐街道办事处槐李村	109.442	34.5624
西安市渭北中学	陕西省西安市临潼区秦王一路西侧6号	109.185	34.4518
西安市临潼区骊山新家园学校	陕西省西安市临潼区斜口街道108国道南侧	109.191	34.3703
西安市临潼区代王街道办事处闫庙小学	陕西省西安市临潼区代王街道办事处宋家村	109.314	34.4392
西安市临潼区零口街道办事处零口小学	陕西省西安市临潼区零口街道办事处零口社区	109.368	34.4765
西安市临潼区小金中心小学	陕西省西安市临潼区小金街道小金村赵家组	109.416	34.3233
西安市临潼区斜口初级中学	陕西省西安市临潼区斜口街道西段	109.191	34.3658
西安市临潼区纸李九年制学校	陕西省西安市临潼区代王平丰街道	109.347	34.4069
西安市临潼区代王街道办事处纸李小学	陕西省西安市临潼区代王街办纸李寸街道	109.312	34.5508
西安市临潼区北田街道办事处滩王小学	陕西省西安市临潼区北田街道办事处滩王村	109.218	34.4554
西安市临潼区行者街道办事处白庙小学	陕西省西安市临潼区行者街道办事处白庙村	109.181	34.3979
西安市临潼区西泉街道办事处坡底小学	陕西省西安市临潼区西泉街道办事处坡底村	109.157	34.3907
西安市临潼区栎阳街道办事处瓦郑小学	陕西省西安市临潼区栎阳街道办事处瓦郑村	109.163	34.5742
西安市临潼区交口街道办事处交口小学	陕西省西安市临潼区交口街道办事处交口村	109.296	34.5494
西安市临潼区相桥街道办事处新李小学	陕西省西安市临潼区新李村1号	109.369	34.5788
西安市临潼区行者街道办事处行者小学	陕西省西安市临潼区行者街道办事处行者村	109.206	34.396
西安市临潼区交口街道办事处安屯小学	陕西省西安市临潼区交口街道办事处安屯村店东组	109.262	34.5458
西安市临潼区交口初级中学	陕西省西安市临潼区交口街道权中村	109.298	34.5743
西安市临潼区斜口街道办事处斜口小学	陕西省西安市临潼区斜口街道办事处斜口街道127号	109.156	34.3588
西安市临潼区栎阳街道办事处栎阳小学	陕西省西安市临潼区栎阳街道办事处栎阳村	109.214	34.5842
西安市临潼区任留街道办事处任留小学	陕西省西安市临潼区任留街道办事处任留村	109.229	34.4823
西安市临潼区雨金街道办事处夏柳小学	陕西省西安市临潼区雨金街道办事处夏柳村	109.219	34.5404
西安市临潼区东岳中心小学	陕西省西安市临潼区穆寨街道西王坡村1号	109.366	34.3213
西安市临潼区新丰初级中学	陕西省西安市临潼区新丰街道东段	109.268	34.4228
西安市临潼区铁炉街道办事处柏李小学	陕西省西安市临潼区铁炉街道办事处岩张村李北组	109.453	34.3822
西安临潼三维小学	陕西省西安市临潼区西泉街办椿树村	109.107	34.3823
西安市临潼区徐杨街道办事处公义小学	陕西省西安市临潼区徐杨街道办事处公义村	109.149	34.6062
西安市临潼区新市街道办事处郝邢小学	陕西省西安市临潼区新市街道办事处郝邢村	109.169	34.5573
西安市临潼区徐杨街道办事处屯刘小学	陕西省西安市临潼区徐杨街道办事处屯刘村	109.154	34.5945
西安市临潼区徐杨街道办事处徐杨小学	陕西省西安市临潼区徐杨街道办事处徐杨村	109.147	34.6228
西安市临潼区任留街道办事处三王小学	陕西省西安市临潼区任留街道办事处三王村	109.248	34.4703
西安市临潼区油槐街道办事处南杨小学	陕西省西安市临潼区油槐街道办事处南杨村	109.337	34.5509
西安市临潼区零口街道办事处孟塬小学	陕西省西安市临潼区零口街道办事处孟塬村	109.394	34.4527
西安市临潼区斜口街道办事处岳家沟小学	陕西省西安市临潼区斜口街道办事处岳沟村	109.149	34.3519
西安市临潼区交口街道办事处念杨小学	陕西省西安市临潼区交口街道办事处念杨村	109.286	34.5477
西安市临潼区零口鸿州小学	陕西省西安市临潼区零口街道办事处鸿洲新城社区居委会	109.381	34.4905
西安市临潼区斜口街道办事处付家小学	陕西省西安市临潼区斜口街道办事处付家村	109.156	34.3588
西安市临潼区代王街道办事处李河小学	陕西省西安市临潼区代王街道办事处李河村	109.315	34.3896
西安市临潼区雨金街道办事处照渠小学	陕西省西安市临潼区雨金街道办事处照渠村	109.235	34.5506
西安市临潼区交口街道办事处权中小学	陕西省西安市临潼区交口街道办事处权中村	109.298	34.5743
西安市临潼区交口街道办事处孙赵小学	陕西省西安市临潼区交口街道办事处孙赵村	109.279	34.5806
西安市临潼区铁炉街道办事处柳家小学	陕西省西安市临潼区铁炉街道办事处柳家村	109.418	34.4074
西安市临潼区秦陵街道办事处秦陵小学	陕西省西安市临潼区秦陵街道下和村	109.269	34.3863
西安市临潼区相桥街道办事处张八小学	陕西省西安市临潼区相桥街道办事处张八村	109.404	34.6377
西安市临潼区栎阳街道办事处朝邑小学	陕西省西安市临潼区栎阳街道办事处朝邑村	109.188	34.5972
西安市临潼区雨金街道办事处北湃小学	陕西省西安市临潼区雨金街道办事处北湃村	109.217	34.5109
西安市临潼区铁炉街道办事处师家小学	陕西省西安市临潼区铁炉街道办事处南韩村	109.416	34.3847
西安市临潼区行者街道办事处小寨小学	陕西省西安市临潼区徐杨街道办事处公义村	109.149	34.6062
西安市临潼区栎阳街道办事处胡张小学	陕西省西安市临潼区栎阳街道办事处胡张村	109.228	34.5816
西安市临潼区栎阳街道办事处南寨小学	陕西省西安市临潼区栎阳街道办事处南寨村新一组	109.215	34.5624
西安市临潼区交口街道办事处新民小学	陕西省西安市临潼区交口街道办事处新民村	109.334	34.5934
西安市临潼区行者初级中学	陕西省西安市临潼区行者街道行东村	109.205	34.4023
西安市临潼区新丰机筑小学	陕西省西安市临潼区新丰老街153号	109.265	34.4321
西安市临潼区新市初级中学	陕西省西安市临潼区新市街道东段	109.183	34.5378
西安市临潼区雨金街道办事处雨金小学	陕西省西安市临潼区雨金街道办事处雨金村	109.249	34.5138
西安市临潼区马额街道办事处宁家小学	陕西省西安市临潼区马额街道办事处宁家村	109.403	34.4195
西安市临潼区徐杨街道办事处新华小学	陕西省西安市临潼区徐杨街道办事处新华村	109.153	34.6385
西安市临潼区马额街道办事处马家小学	陕西省西安市临潼区马额街道办事处马家村	109.391	34.3944
西安临潼新源小学	陕西省西安市临潼区新市街办大刘村	109.19	34.5525
西安市临潼区马额街道办事处塚王小学	陕西省西安市临潼区马额街道办事处冢王村	109.38	34.3985
西安市临潼区铁炉街道办事处铁炉小学	陕西省西安市临潼区铁炉街道办事处铁炉村	109.449	34.3935
西安市临潼区代王街道办事处安沟小学	陕西省西安市临潼区代王街道办事处安沟村	109.288	34.4052
西安市临潼区雨金街道办事处胡门小学	陕西省西安市临潼区雨金街道办事处胡门村	109.246	34.5301
